# Supplementary material for: Perinuclear Arp2/3-driven actin polymerization enables nuclear deformation to facilitate cell migration through complex environments
Source: Nat Commun. 2016 Mar 15;7:10997. doi: 10.1038/ncomms10997 (PMC4796365; doi:10.1038/ncomms10997)
Supplement: Supplementary Figures, — Supplementary Figures 1-15, Supplementary Tables 1-2, Supplementary Discussion and Supplementary References [file ncomms10997-s1.pdf]

Supplementary Figure 1

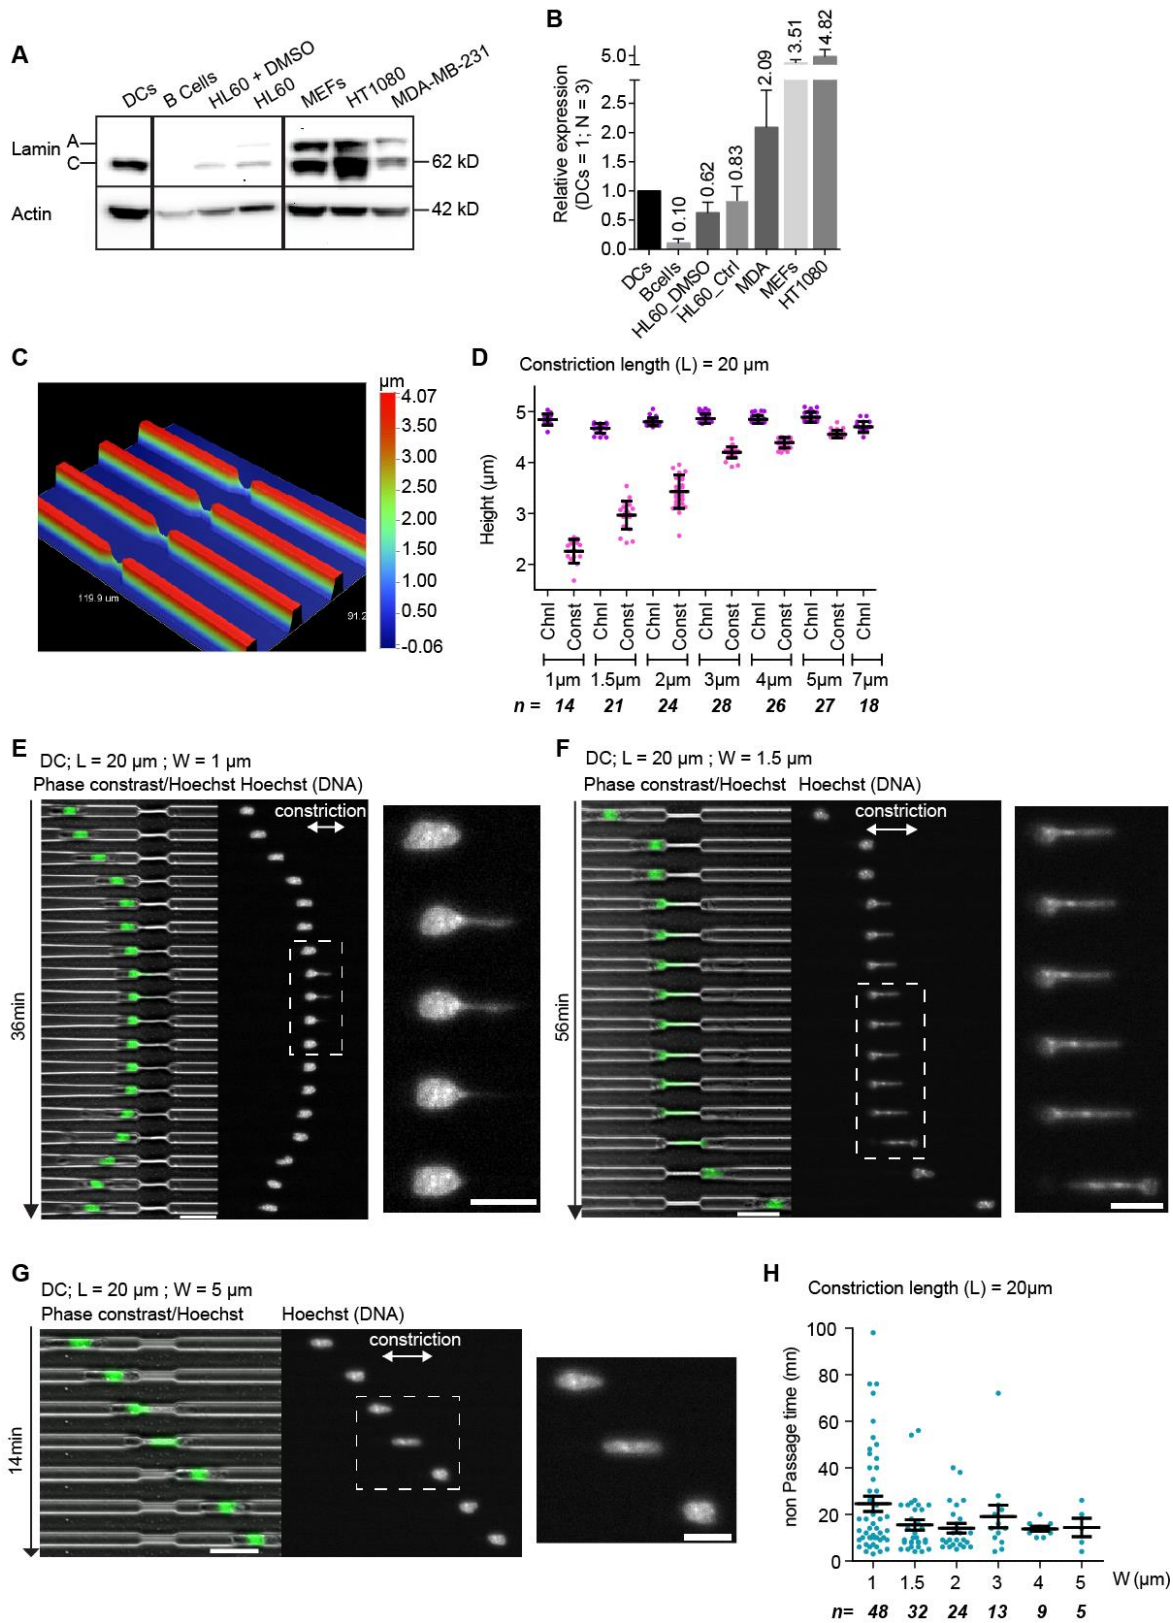

**Supplementary Figure 1: Characterization of constriction sizes and details of DCs migration through 20  $\mu\text{m}$  long constrictions.** (A) Western blot showing lamin A/C expression level in various representative cell types for a qualitative comparison of typical cell types used in 3D cell migration studies and characterized for their lamin A/C expression, with mice bone-marrow derived DCs, which have not been characterized before for their level of lamin A/C expression; G-actin is shown as loading control. (B) Quantification from 3 independent western blots of the relative lamin A/C expression in cells in (A). Bars represent the mean; error bars the standard error on the mean. (C) Image from an optical profilometer of a region of a master mold containing channels with constrictions. (D) Measure of channels and constrictions height by confocal microscopy. Lines show means; bars show standard deviations. Chnl = channels, Const = constriction. The width of the constrictions is shown on the X axis. (E) Sequential images of a DC stained with Hoechst (DNA, green) attempting to migrate through a 1  $\mu\text{m}$  wide constriction. (F) and (G) Sequential images of DCs migrating through respectively 1.5  $\mu\text{m}$  and 5  $\mu\text{m}$  wide constrictions. (E), (F) and (G) Right side: magnified images to visualize nuclear deformation. Scale bar, 30  $\mu\text{m}$  for phase contrast and DNA overlays, 15  $\mu\text{m}$  for zoom of the DNA in constrictions. (H) Quantification of the time spent by non-passing cells in constrictions as a function of the constriction cross section area. The mean nonpassing time (> 14 minutes) is much higher than zero, meaning that cells which did not pass constrictions did not turn back because of a lack of persistence. (D) and (H) n represents respectively the number of channels and cells. W: constriction width. L: constriction length. Error bars in (H) represent standard deviation.

## Supplementary Figure 2

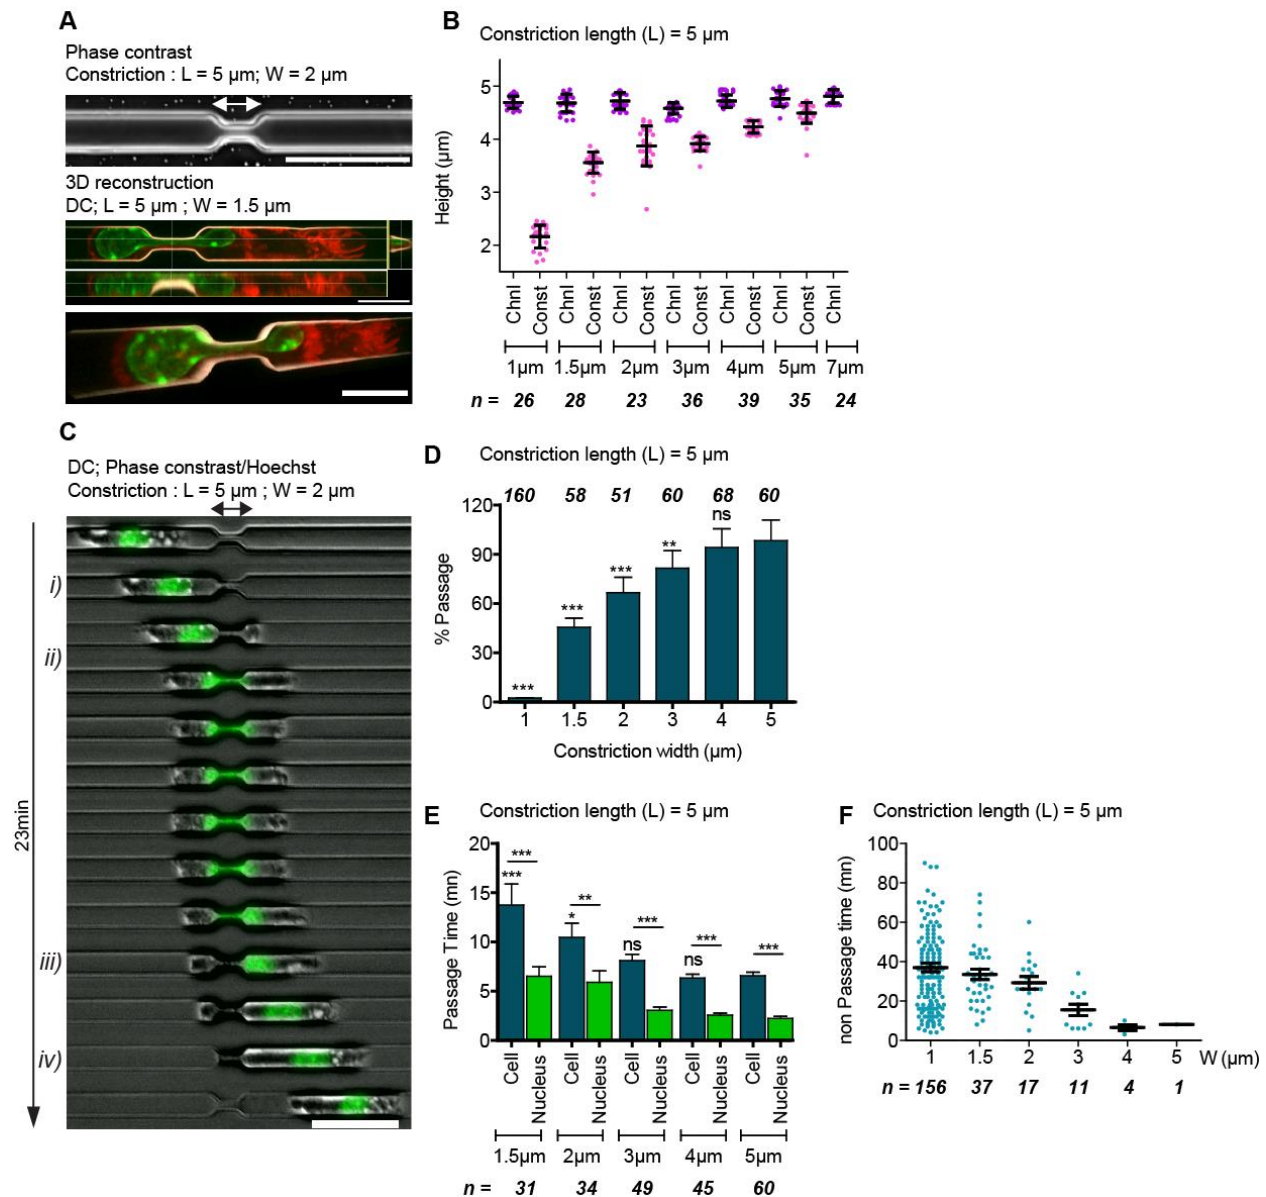

**Supplementary Figure 2: The physical limit imposed by the nucleus is independent of the constriction length: characterization of the  $5 \mu\text{m}$  long constrictions.** (A) Top: phase contrast image of a channel with a  $5 \mu\text{m}$  long and  $2 \mu\text{m}$  wide constriction. Middle and bottom: 3D reconstruction from a 3D stack. Ia $\beta$ -GFP (red) DC in a  $1.5 \mu\text{m}$  wide constriction coated with pLL-PEG (gray scale). The DNA in green is stained with Hoechst. Middle: Different views of the 3D reconstruction. Right: view of the cross section. Bottom: Perspective view of the 3D reconstruction with a  $45^\circ$  angle.

Scale bar top: 30  $\mu\text{m}$ , middle and bottom: 10  $\mu\text{m}$ . **(B)** Measure of channels and constrictions height by confocal microscopy. Lines for mean; bars for standard deviation. Chnl for channels, Const for constriction. The width of the constrictions is shown on the X axis. n represents the number of channels **(C)** Sequential images of an DC crossing a 2  $\mu\text{m}$  wide constriction. i), ii), iii), iv) respectively indicate cell entry, nuclear entry, nuclear exit, cell exit. Scale bar 30  $\mu\text{m}$ . **(D)** Percentage of passage as function of the constriction cross section area. Numbers above bars represent the number of cells scored. Time in minutes: seconds. **(E)** Cell (blue) and nuclear (green) passage time. Unless when indicated by a spanner, statistical test was against the value for 5  $\mu\text{m}$  wide constrictions. P-value: \*\*\*, \*\* and \* indicate  $< 0.0001$ ,  $< 0.001$ , and  $< 0.01$ . ns = non-significant. Statistical test: Fisher test for **(D)**, Mann-Whitney test for **(E)**. **(F)** Cell non passage time which measures the time spent in the constriction by non-passing cells. **(E)**, **(F)**: n represents the number of cells scored. W: constriction width. Error bars in **(D)** and **(E)** represent standard deviation. Error bars in **(F)** represent standard deviation

## Supplementary Figure 3

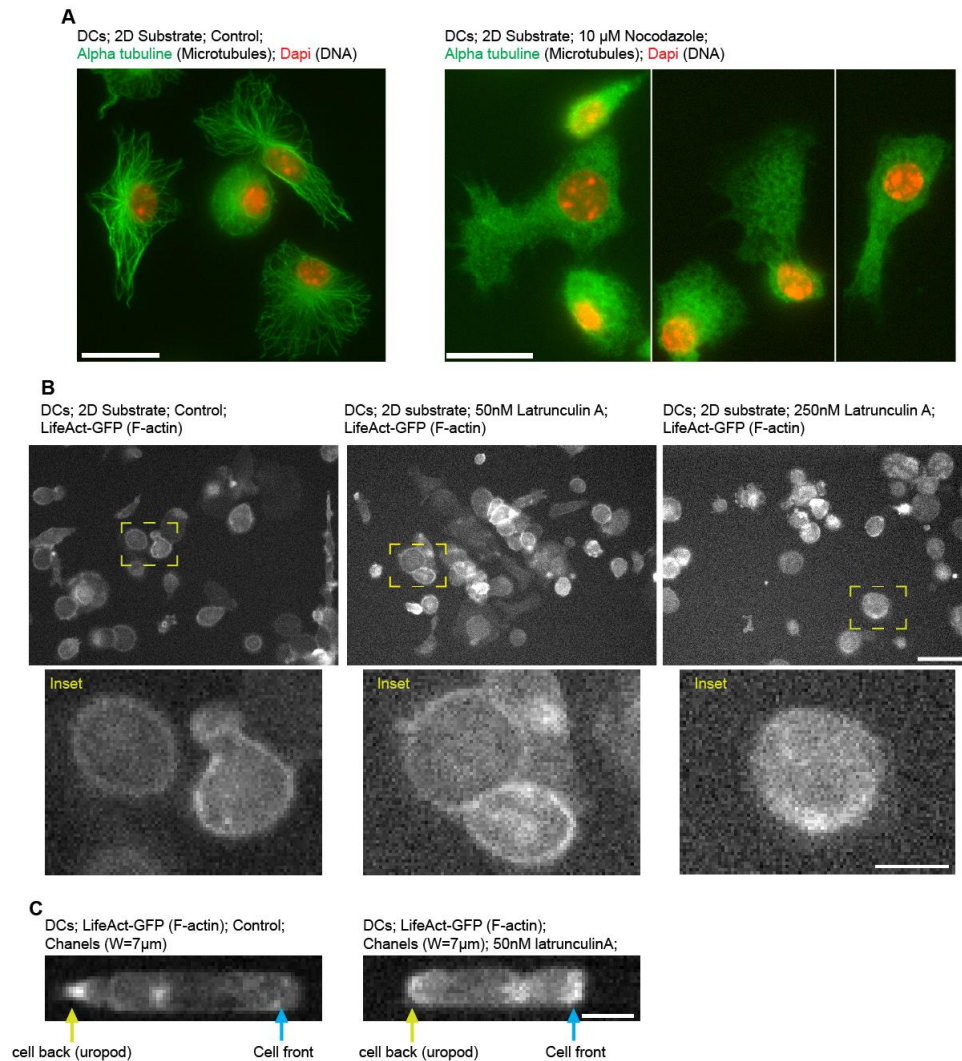

**Supplementary Figure 3: The microtubule network is disrupted with 10  $\mu$ M nocodazole treatment and treatment with 250 nM latrunculin A disrupts the actin cytoskeleton in dendritic cells.** Representative images of immunostained DCs plated on 2D substrates for 6h after treatment with DMSO (**A**- Left), 10  $\mu$ M (**A**-Right) of Nocodazole, DMSO (**B**-left), 50nM (**B**-middle), 250nM (**B**-right) of Latrunculin A. Note the decrease in the number of polarized cells when the Latrunculin A concentration increases. Note that 250 nM of latrunculin A disrupts DCs cortex. (**C**) Representative image of LifeAct-GFP expressing, DMSO (**C**-Left) or 50 nM latrunculin A (**C**-right) treated DC in 7  $\mu$ m channels. Yellow and Blue arrows indicate respectively the cell back and front. Scale bar (**A**), (**B**-up) and (**C**) = 20  $\mu$ m; (**B**)-inset = 10  $\mu$ m

## Supplementary Figure 4

**A**

DC MyosinII WT

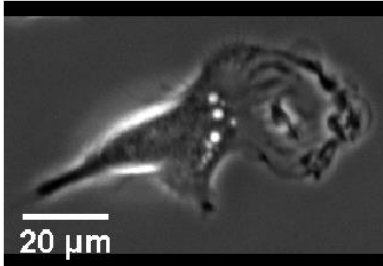

DC MyosinII KO

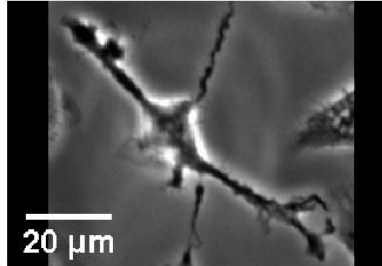

DC MyosinII WT + Blebbistatin

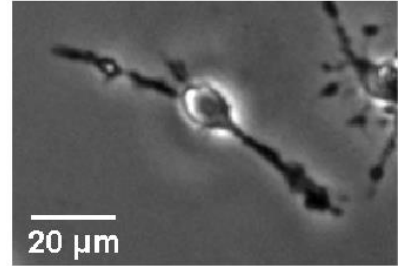

**B**

DC MyosinIIKO; W = 2 μm

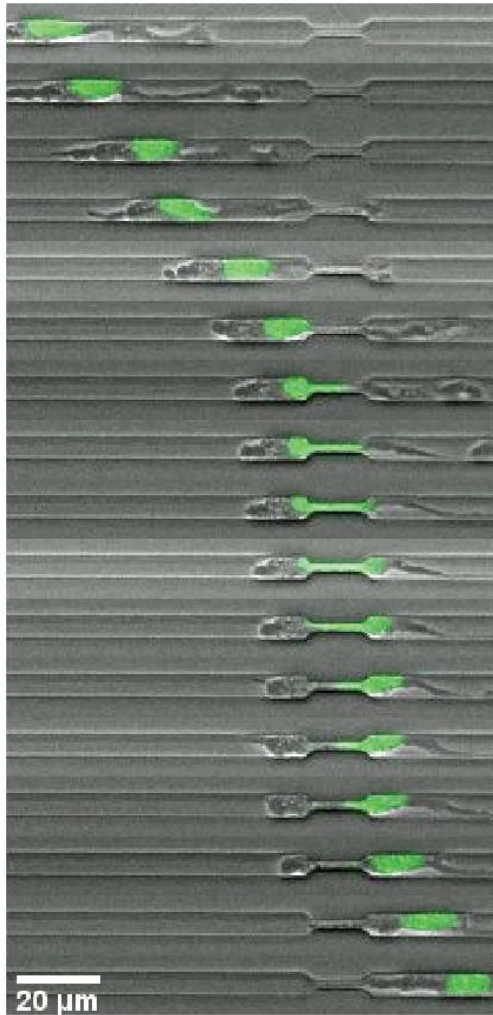

**C**

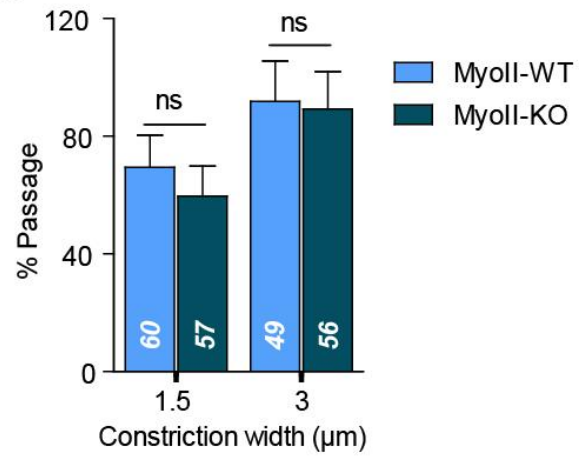

**D**

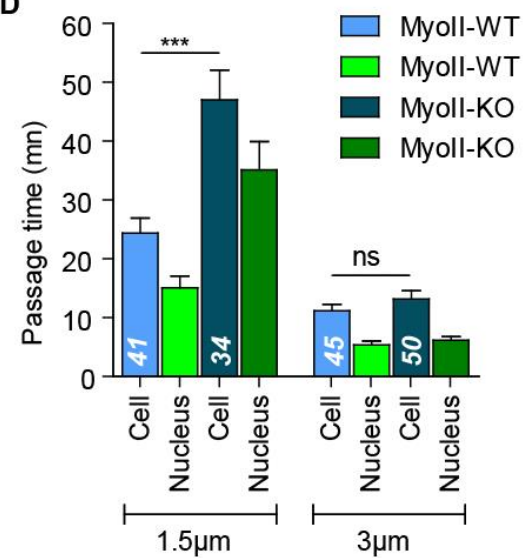

**Supplementary Figure 4: Nuclear squeezing is independent of myosin II activity even in the smallest constrictions.** (A) Representative phase contrast images of wild type, myosin IIA conditional knock out and 50  $\mu$ M blebbistatin treated wild type DCs on 2D substrates. An increase of dendrites was observed upon myosin II inhibition and KO. (B) Montage of a myosin II KO DC migrating through a 2  $\mu$ m wide constriction. Note the long cell front and cell rear; a hallmark of myosin II inhibited/KO DCs. (C) Percentage of passage as a function of the constriction cross section area. (D) Cell (blue) and nuclear (green) passage time of WT and myosin IIA KO DCs. myosin II depletion induced a significant increase in the cell as well as the nuclear passage time in 1.5  $\mu$ m constrictions. Numbers in bars represent the number of cells scored. P\_value: \*\*\*, \*\* and \* indicate  $< 0.0001$ ,  $< 0.001$ , and  $< 0.01$ . ns = non-significant. Statistical test: Fisher test for (C), Mann-Whitney test for (D). W: constriction width. Error bars in (C) and (D) represent standard deviation.

## Supplementary Figure 5

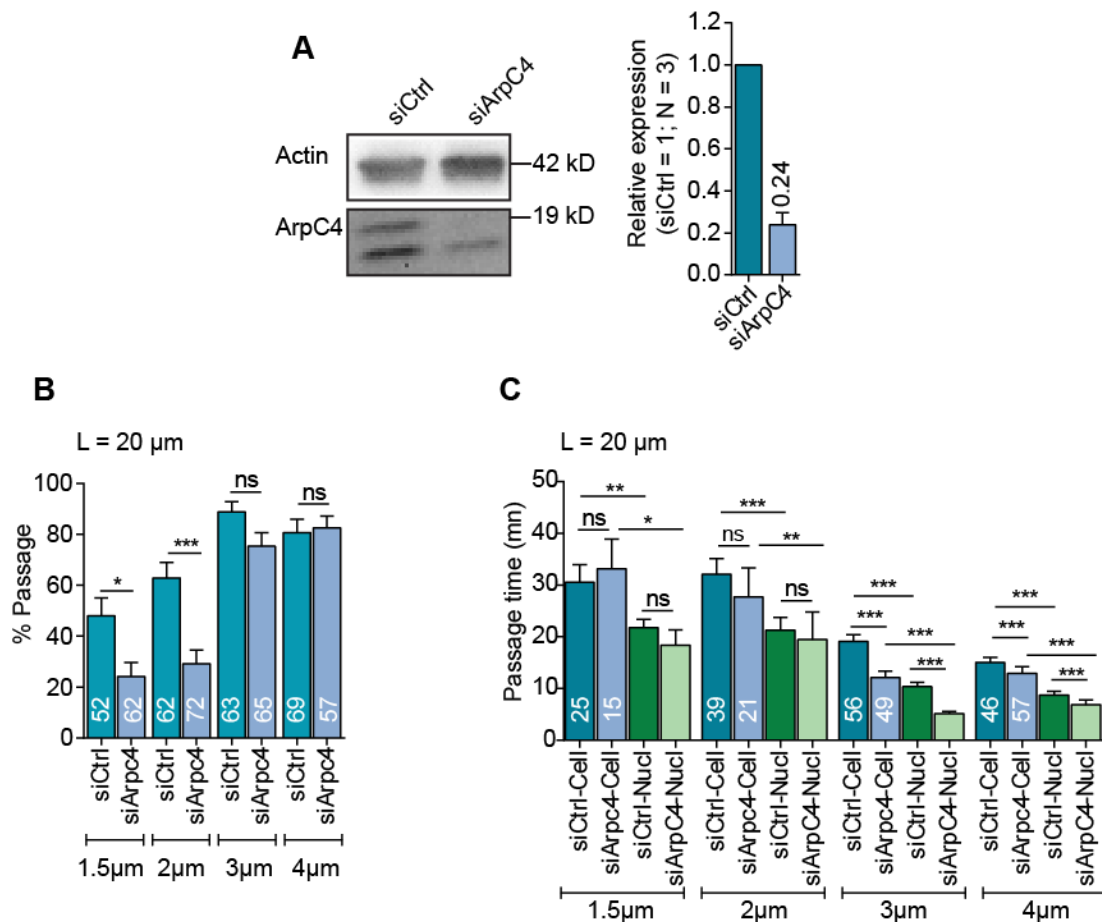

**Supplementary Figure 5: Arp2/3 inhibition and depletion in DCs.** (A) Western blot quantifying the relative expression of ArpC4 in DCs electroporated with non-targeting control or ArpC4 siRNA. (B) Percentage of passage, and (C) passage time in 1.5, 2, 3 and 4  $\mu$ m wide constrictions of DCs treated as indicated. siCtrl = control siRNA; siArpC4 = ArpC4 siRNA. (B), (C): numbers represent the number of cells observed. Error bars are standard error of the mean. P\_value: \*\*\*, \*\* and \* indicate < 0.0001, < 0.001, and < 0.01. ns = non-significant. Statistical test: Fisher test for (B), Mann-Whitney test for (C). L: constriction length.

Supplementary Figure 6

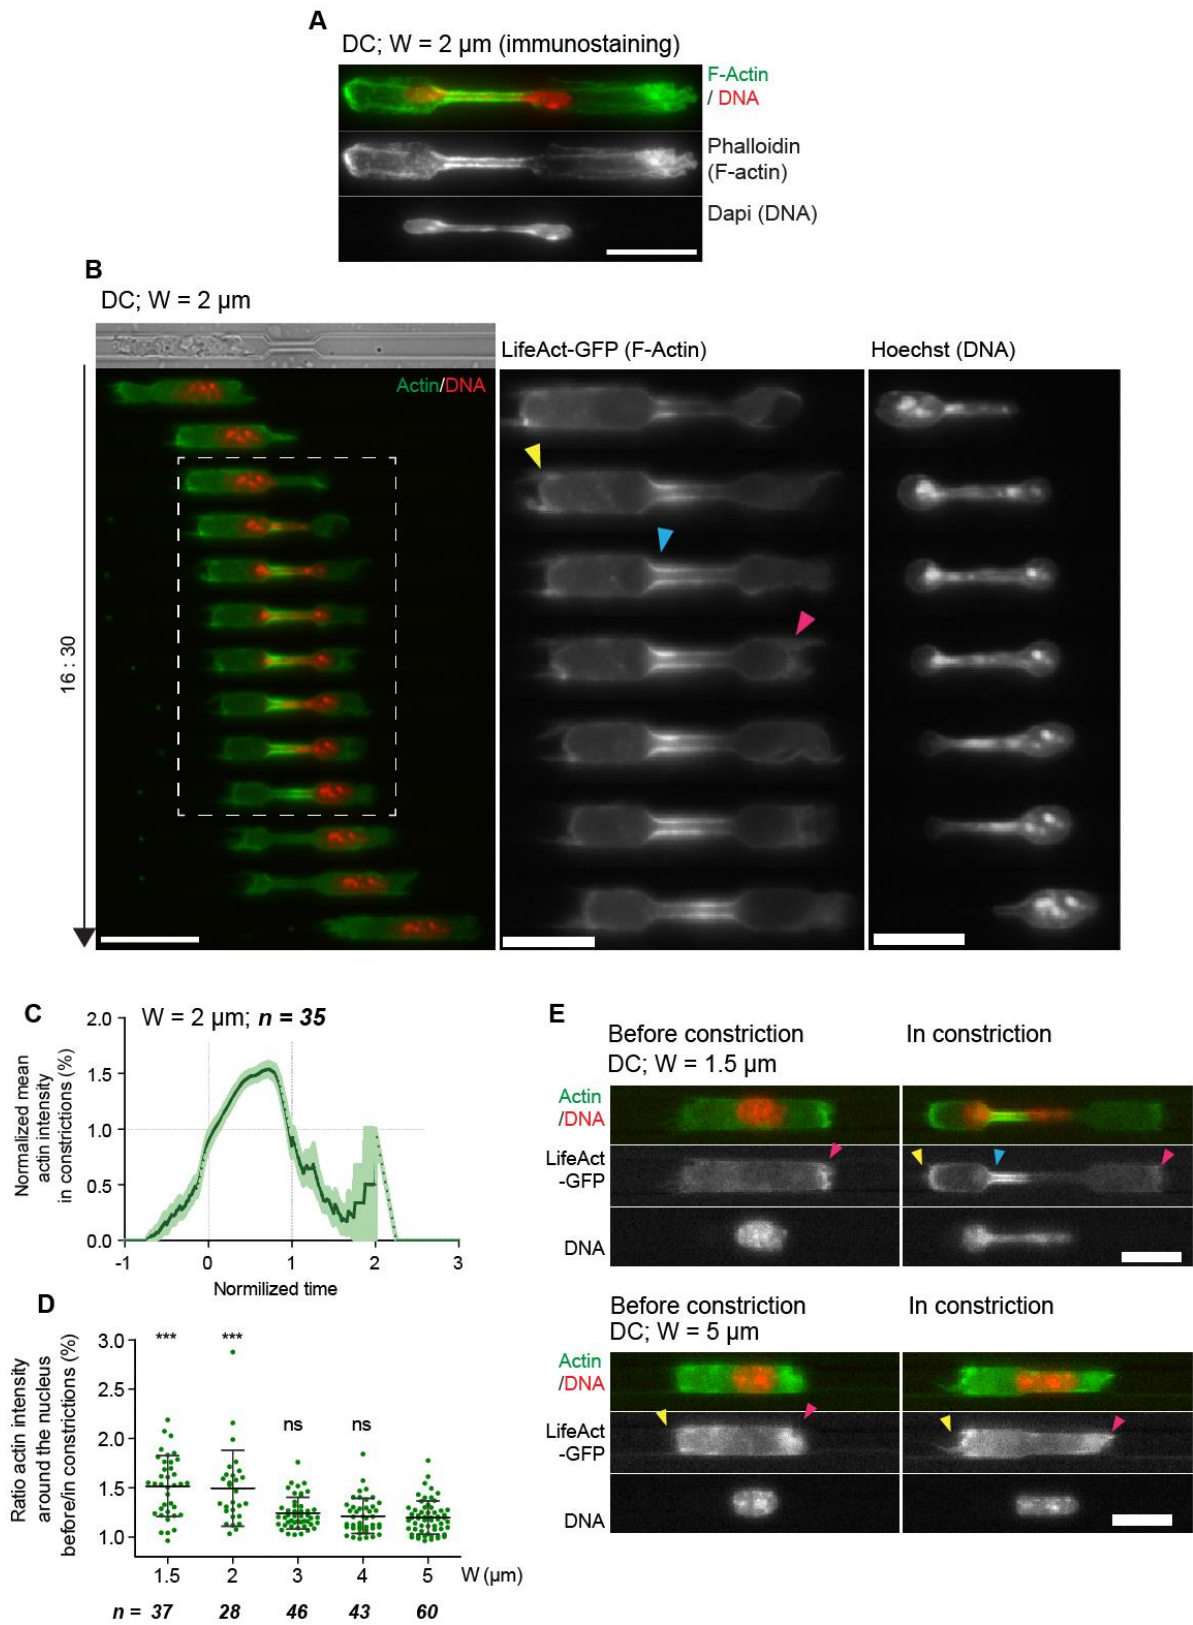

**F** DC;  $W = 1.5\ \mu\text{m}$

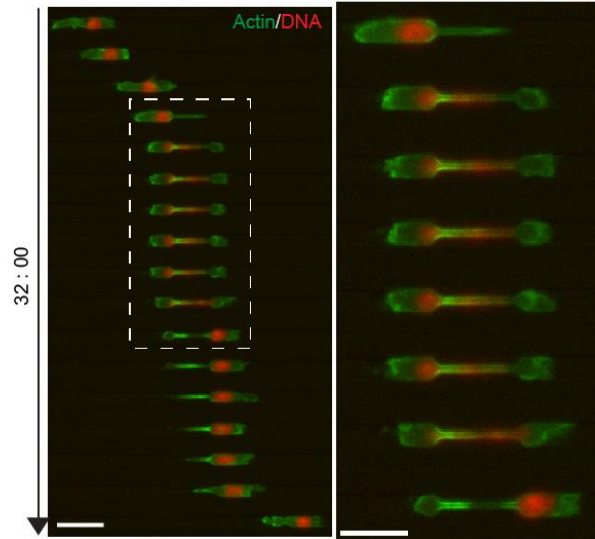

**G**  $W = 1.5\ \mu\text{m}; n = 37$

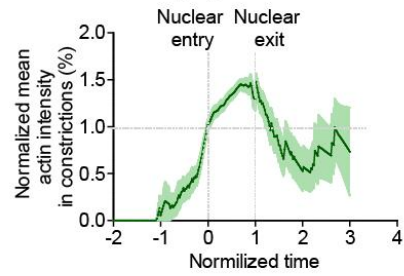

**H**  $W = 1.5\ \mu\text{m}; n = 37$

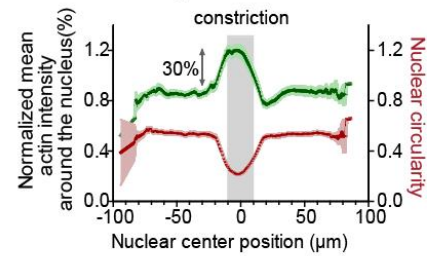

**I** DC;  $W = 3\ \mu\text{m}$

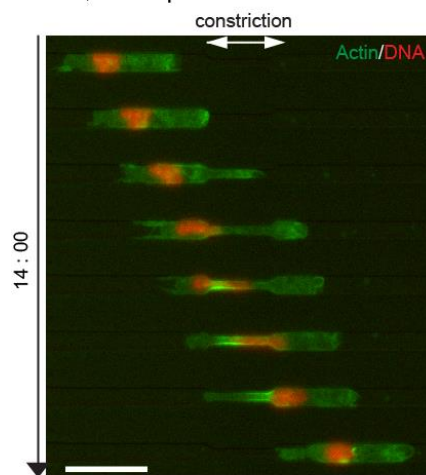

**J**  $W = 3\ \mu\text{m}; n = 47$

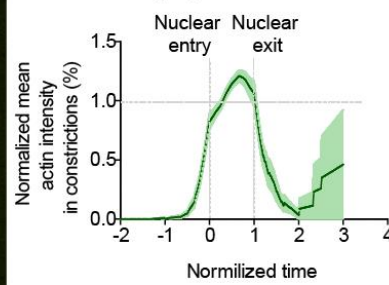

**K**  $W = 3\ \mu\text{m}; n = 47$

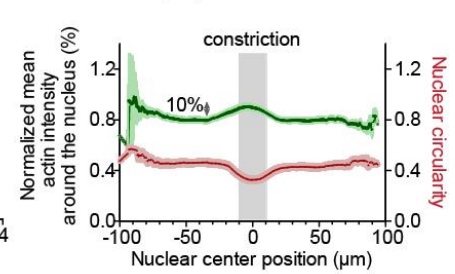

**L** DC;  $W = 5\ \mu\text{m}$

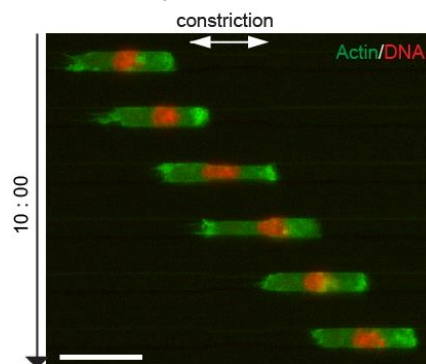

**M**  $W = 5\ \mu\text{m}; n = 62$

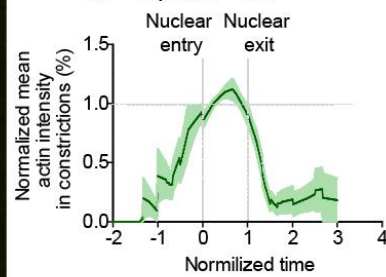

**N**  $W = 5\ \mu\text{m}; n = 62$

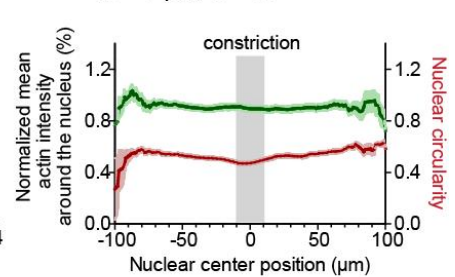

**Supplementary Figure 6: Accumulation of actin filaments around the nucleus occurs only for high nuclear deformation.** (A) F-actin localization (Phalloidin staining) in DC in a 2  $\mu\text{m}$  wide constriction. Scale bar: 15  $\mu\text{m}$  (B) Sequential images of a representative DC expressing LifeAct-GFP (actin, green) and stained with Hoechst (DNA, red) migrating through a 2  $\mu\text{m}$  wide constriction. Yellow, blue and pink arrows point to actin accumulation respectively at the cell rear, at the nucleus and at the cell front. Scale bar for the overlay: 30  $\mu\text{m}$ ; actin and DNA: 15  $\mu\text{m}$ . Time in minutes: seconds. (C) Normalized mean actin intensity in 2  $\mu\text{m}$  wide constrictions as a function of time relative to nuclear entry and exit. (D) Ratio of the normalized mean actin intensity inside the constriction relative to before the constriction as a function of the constriction width. Lines are for mean and bars for standard deviation. Statistical test was against the value for 5  $\mu\text{m}$  wide constrictions. \*\*\*, for  $P_{\text{value}} < 0.0001$ . ns = non-significant. (E) Representative sequential images of DCs before and inside a 1.5  $\mu\text{m}$  and 5  $\mu\text{m}$  wide constriction. Scale bar 15  $\mu\text{m}$ . (F), (I) and (L) Sequential images of LifeAct-GFP (actin, green) expressing DCs stained with Hoechst (DNA, red), crossing respectively a 1.5, 3 and 5  $\mu\text{m}$  wide constriction. Scale bar: (F)-left; (I) and (L) 30  $\mu\text{m}$ . (F)-right: 20  $\mu\text{m}$  (G), (J) and (M) Normalized mean actin intensity as a function of the normalized time relative to nuclear entry and exit. (H), (K) and (N) Green: normalized mean actin intensity around the nucleus of cells passing through constrictions. Red: Nuclear circularity as a function of the nuclear position. 0 indicates the center of the constriction, grey bars represent the constriction. Dark green/red: mean; light green/red: standard error of the mean. Note the decrease in actin accumulation in constrictions, around the nucleus, as a function of constrictions widths. W: constriction width.

Supplementary Figure 7

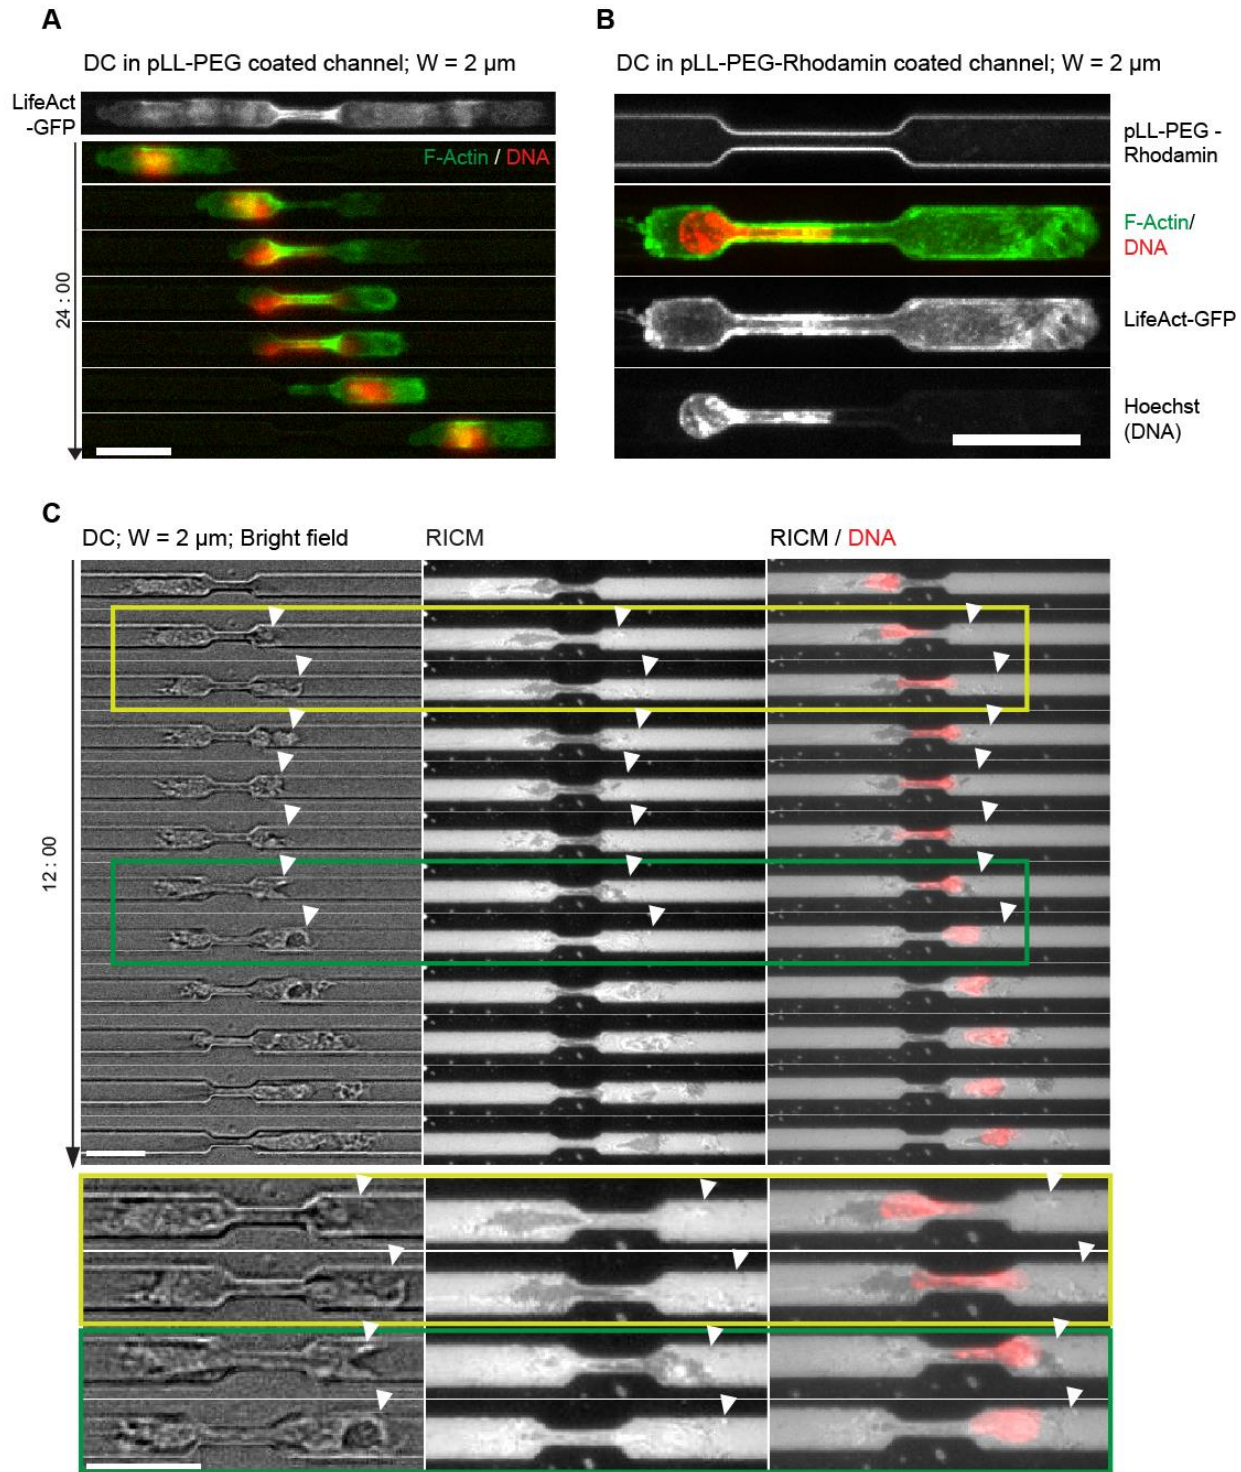

**Supplementary Figure 7: Actin accumulation during nuclear passage through constrictions does not rely on adhesion complexes and no contact between the cell and the substrate is observed at the cell front during nuclear passage. (A) and (B)** Representative image of DCs expressing LifeAct-GFP (actin, green) stained with Hoechst (DNA, red) migrating through pLL-PEG coated constrictions. **(A)**-Top: Maximum projection of the 13 time points of a timelapse movie. **(A)**-Bottom: Sequential images of a representative cell crossing a constriction. Time in minutes: seconds. **(B)** Maximum projection of a Z-stack acquisition. **(C)** Sequential images of a representative liKO iDC in a 2  $\mu\text{m}$  wide constriction coated with pLL-PEG. Left: Bright field images to visualize the cell body. Middle: Reflection Interference Contrast Microscopy (RICM) to visualize cell-substrate contact areas (in dark grey). Right: Overlay of the RICM signal with the Hoechst signal for DNA localization (red). Arrows indicate cell front protrusion. During nuclear passage, the front was not in close contact with the bottom substrate (8 over 8 observed cells). Scale Bar: 20  $\mu\text{m}$ . W: constriction width.

## Supplementary Figure 8

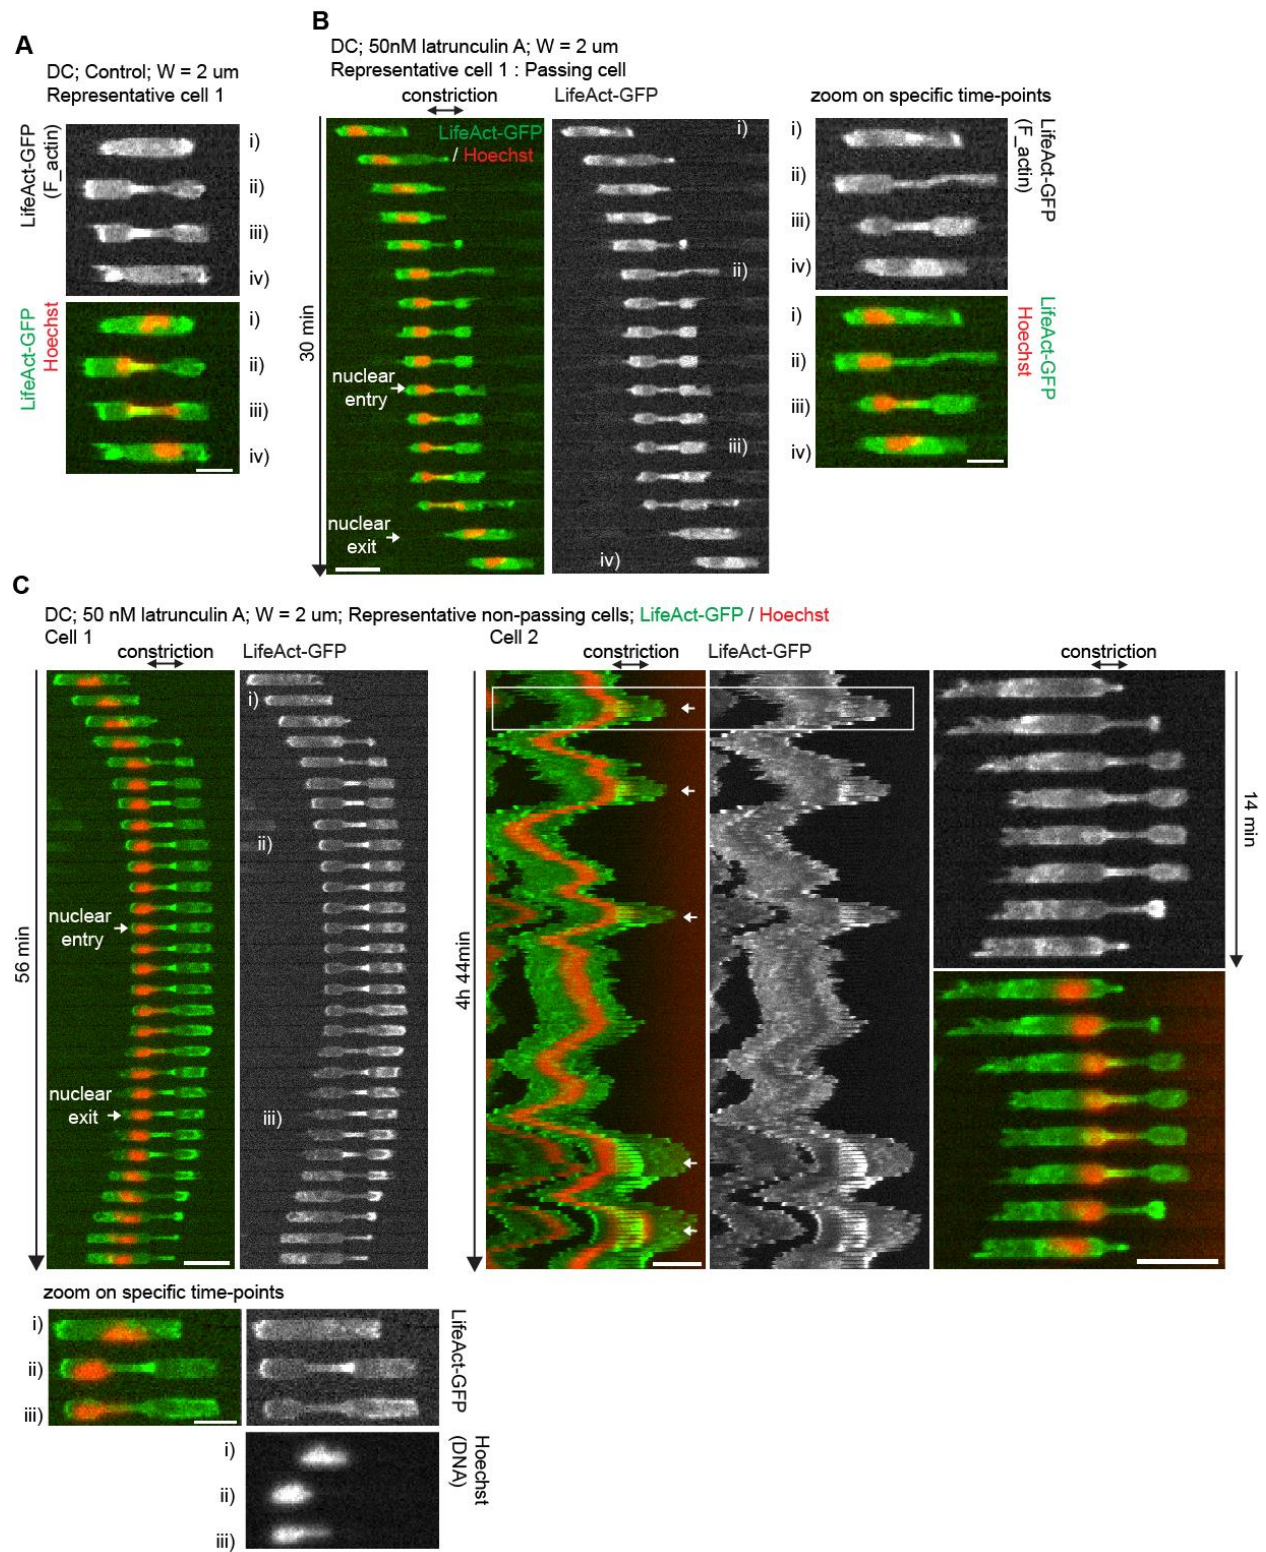

**Supplementary Figure 8: Low doses of latrunculin A (50nM) perturbs the perinuclear actin network formation in constrictions** (A) Sequential images of a representative LifeAct-GFP expressing (actin, green) DC stained with Hoechst (DNA, red) treated with DMSO passing a 2  $\mu$ m wide constriction. One can observe the actin increase in constriction upon nuclear entry. (B) Sequential images of a representative LifeAct-GFP expressing (actin, green) DC stained with Hoechst (DNA, red) treated with 50 nM of latrunculin A passing a 2  $\mu$ m wide constriction. One can observe that actin does not increase in constriction upon nuclear entry (C) Sequential images of 2 representative LifeAct-GFP expressing (actin, green) DCs stained with Hoechst (DNA, red) and treated with 50nM of Latrunculin A attempting to pass a 2  $\mu$ m wide constriction. Representative cell 1: actin starts accumulating in constriction prior nuclear entry and no actin accumulation is observed around the nucleus when it enters the constriction. Representative cell 2 fails to pass the constriction after 5 trials. One can observe the increase of actin in constriction at each trial. Scale bar: 30  $\mu$ m. L: constrictions length. W: constriction width. i): time point before cell and nuclear entry in constriction; ii): time point after cell but before nuclear entry in constriction; iii): time point after cell and nuclear entry in constriction. iii): time point after cell exit from the constriction.

Supplementary Figure 9

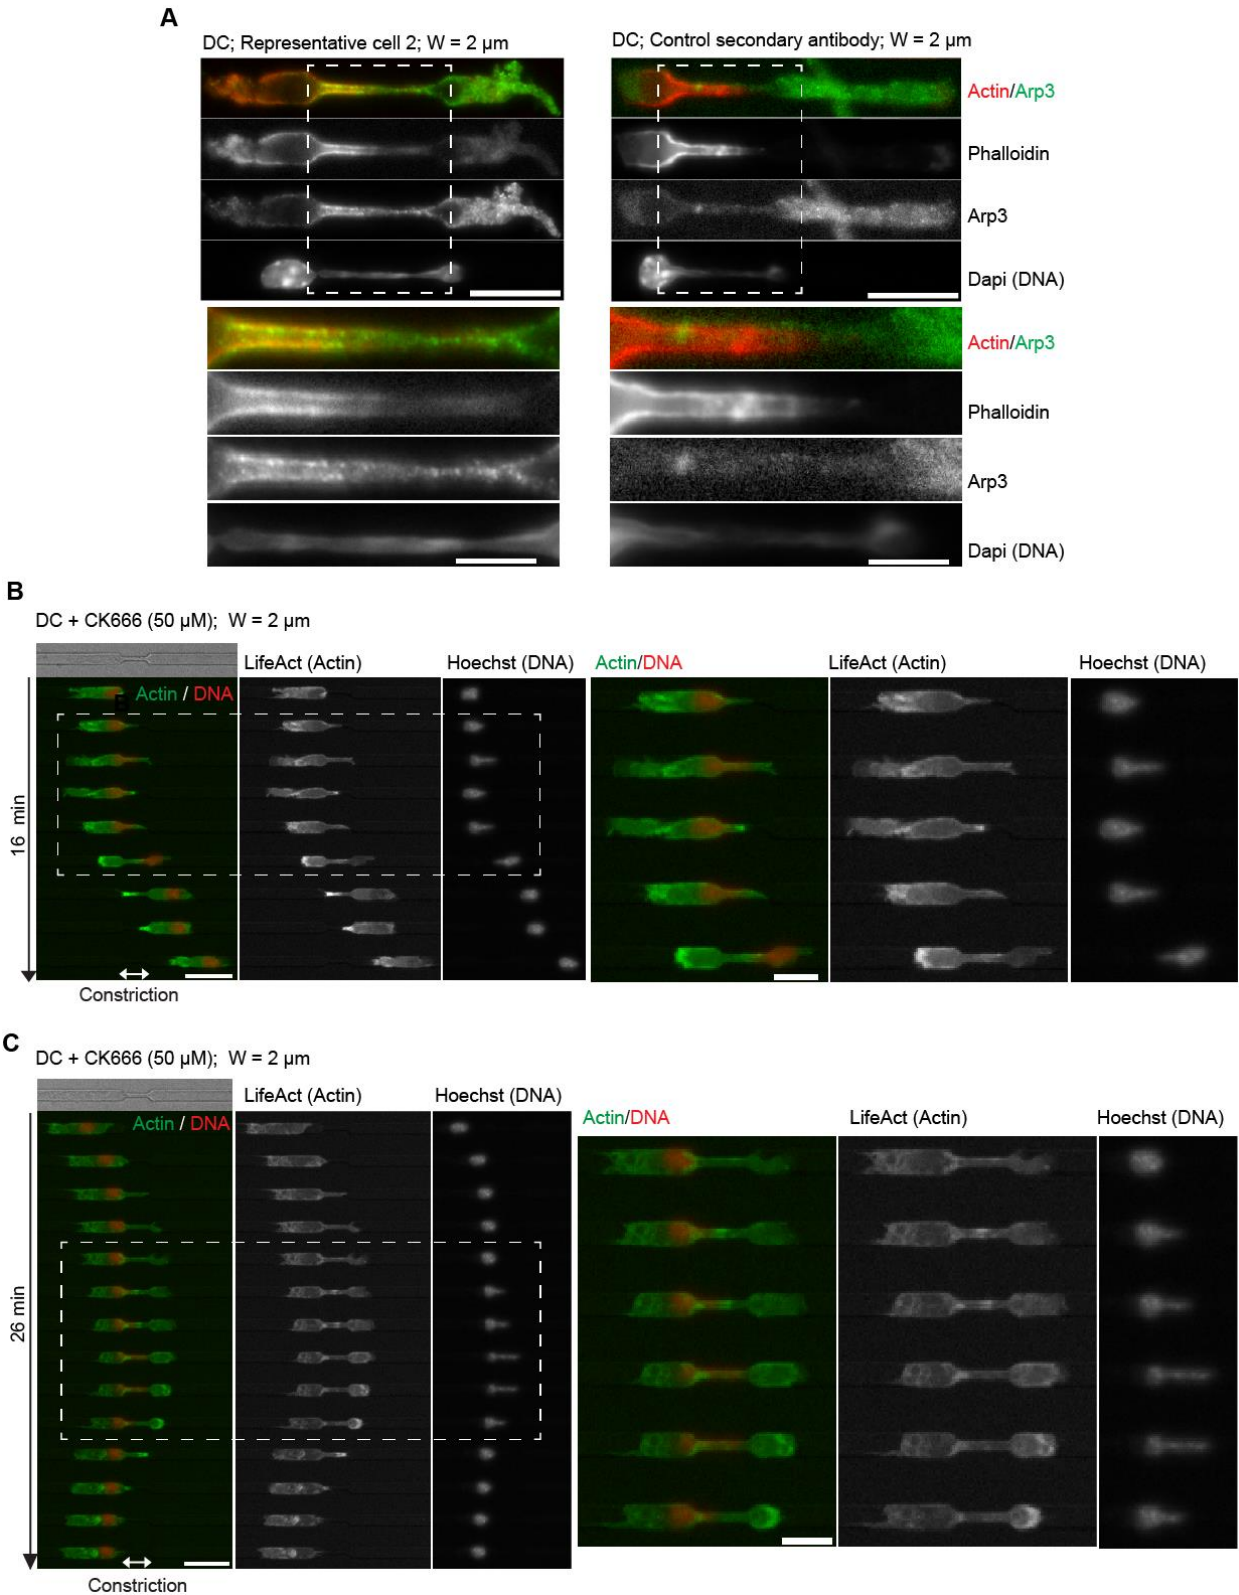

**Supplementary Figure 9: The F-actin meshwork formed around the nucleus is nucleated by Arp2/3.** (A) Immunostaining of the Arp2/3 complex localization in DCs passing 2  $\mu\text{m}$  wide constrictions. F-actin was stained with phalloidin. Control secondary antibody staining (right) shows that the accumulation of Arp3 staining co-localized with F-actin was specific. Bottom: Magnification of the image at the constriction for a better visualization of the Arp3/F-actin co-localization around the nucleus. Scale bar top: 15  $\mu\text{m}$ ; bottom: 5  $\mu\text{m}$ . (B) Sequential images of a representative LifeAct-GFP expressing (actin, green) DC stained with Hoechst (DNA, red) treated with 50 $\mu\text{M}$  of the Arp2/3 inhibitor CK666 but still passing a constriction. No actin increase was observed around the nucleus during its deformation through the constriction. (C) Sequential images of a representative LifeAct-GFP (actin, green) expressing DC stained with Hoechst (DNA, red) treated with 50  $\mu\text{M}$  of the Arp2/3 inhibitor CK666, and failing to pass a constriction. A transient and faint actin increase in the constriction correlating with nuclear entry could be observed. Scale bar (B) and (C) entire field: 30  $\mu\text{m}$ ; Zoom: 15  $\mu\text{m}$ . min for minutes. W: constriction width. L: constriction length.

Supplementary Figure 10

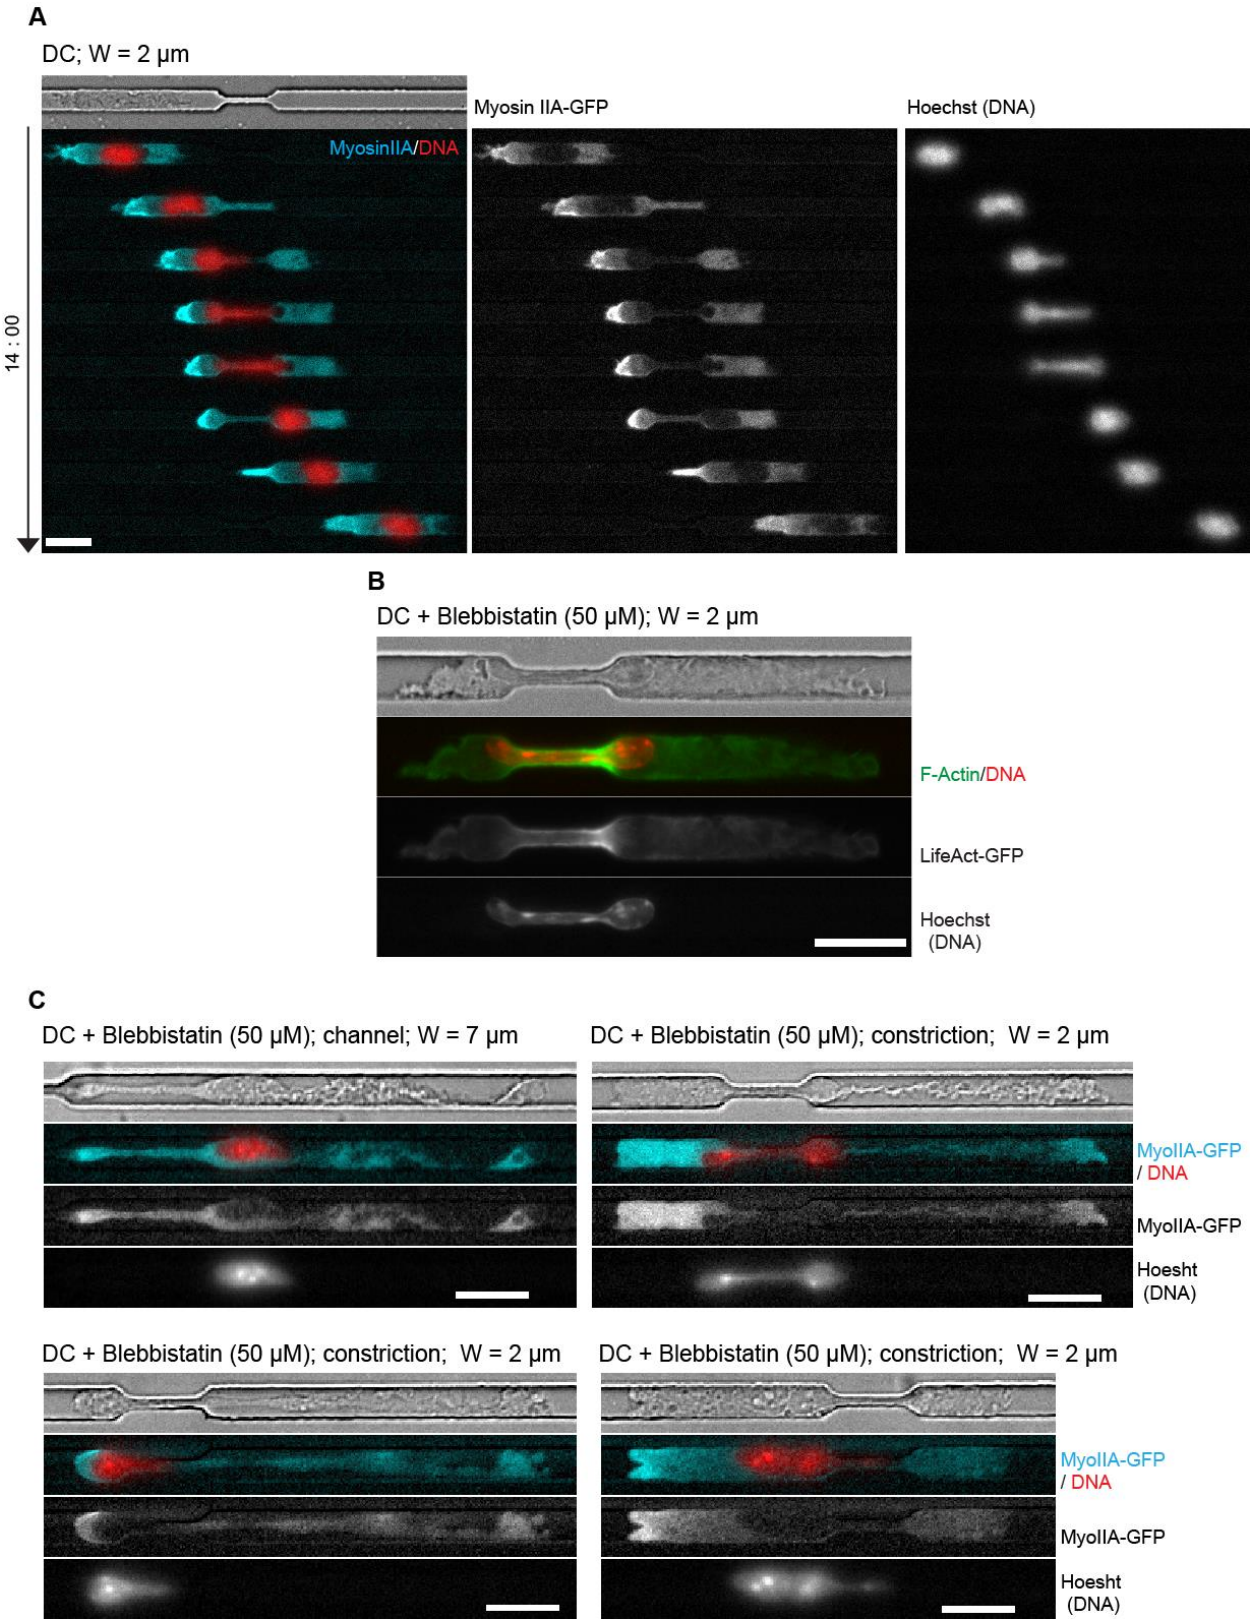

**Supplementary Figure 10: The F-actin accumulation around the nucleus does not co-localize with myosin II and does not depend on myosin II activity. (A)**

Sequential images of a representative myosin IIA-GFP (cyan) expressing DC migrating through a 2  $\mu\text{m}$  wide constriction. myosin IIA-GFP accumulated at the cell back but not around the nucleus inside the constriction. Time in minutes: seconds. (B)

Representative image of 19 over 21 cells observed for LifeAct-GFP (green) expressing DC stained with Hoechst (DNA, red) and treated with 50  $\mu\text{M}$  blebbistatin, migrating in a 2  $\mu\text{m}$  wide constriction. A single time point was acquired to avoid damaging blebbistatin with the excitation light. The long cell front was typical of myosin II inhibited DCs. Scale bar 15  $\mu\text{m}$ . (C)

Representative images of myosin IIA-GFP (cyan) DCs stained with Hoechst (DNA, red) and treated with 50  $\mu\text{M}$  blebbistatin. Single time points were acquired to avoid damaging blebbistatin with the excitation light. Top-left: the cell just exited the constriction; top-right: the cell and its nucleus were fully engaged in the constriction; bottom: the cells were fully engaged but the nucleus was just starting to enter the constriction. The absence of myosin IIA-GFP accumulation at the cell back demonstrated efficient inhibition of myosin II motor activity by blebbistatin inside the channels, and the long cell front extension was characteristic of blebbistatin treated and myosin IIA KO DCs. W: constriction width.

## Supplementary Figure 11

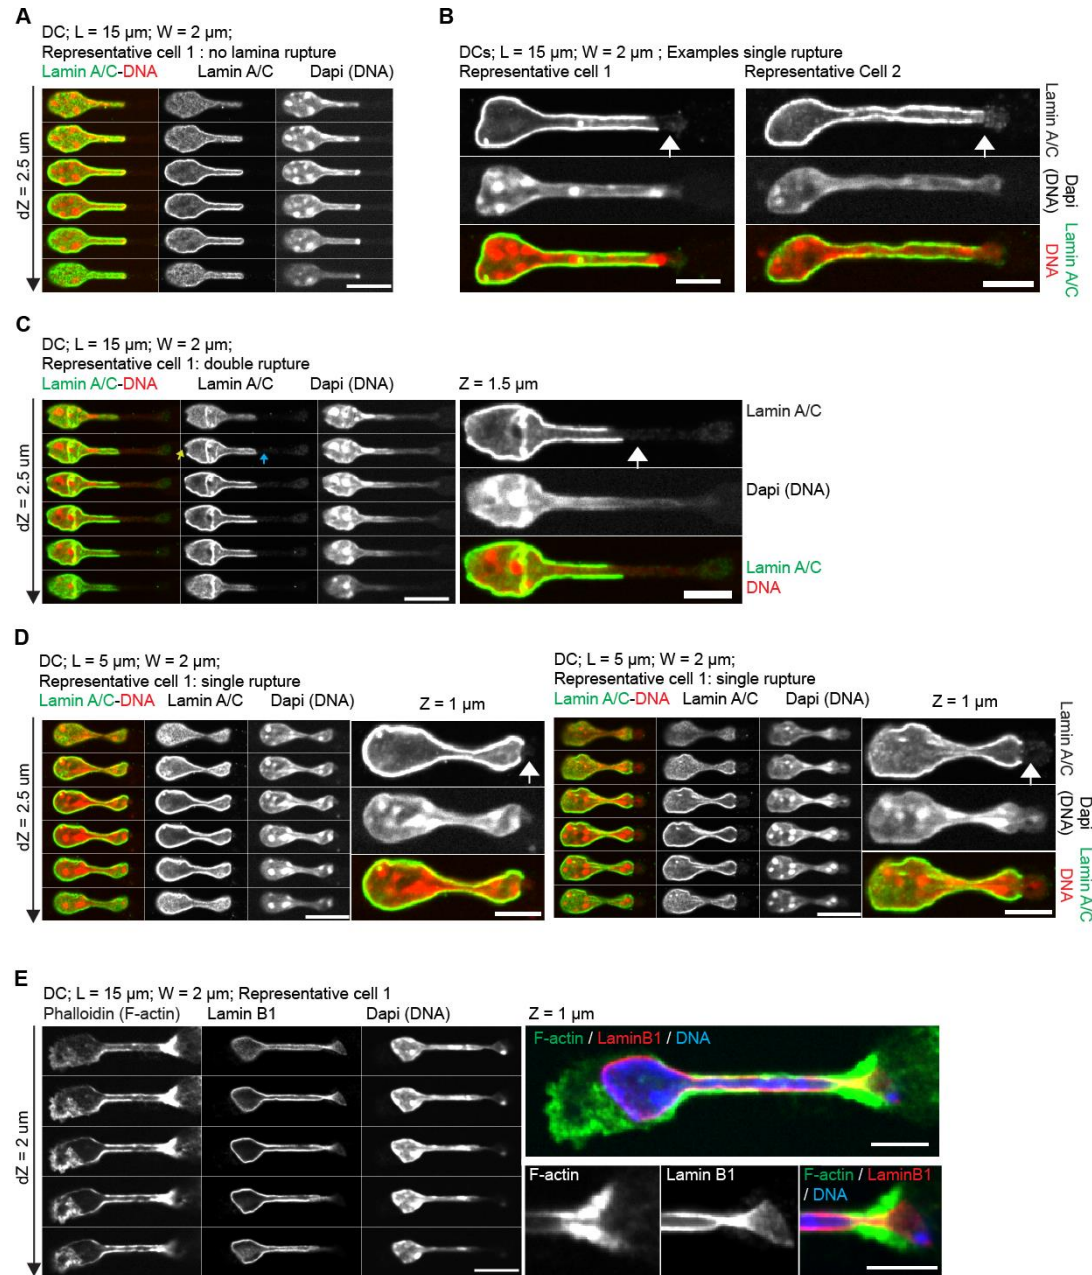

**Supplementary Figure 11: Nuclear deformation through narrow constrictions leads to lamina breakage.** Representative images of immunostained DCs in 2  $\mu\text{m}$  wide and 15  $\mu\text{m}$  (A), (B), (C), (E), or 5  $\mu\text{m}$  (D) long constrictions. White arrows to show ruptured lamina network, yellow and blue arrows show lamina rupture respectively at the back and front of the nucleus in (C). Scale bar: 10  $\mu\text{m}$  (A, C-left, non-zoomed images in D, E-left); 5  $\mu\text{m}$  (B, C-right, Zoom in D, E-right).

## Supplementary Figure 12

**A**

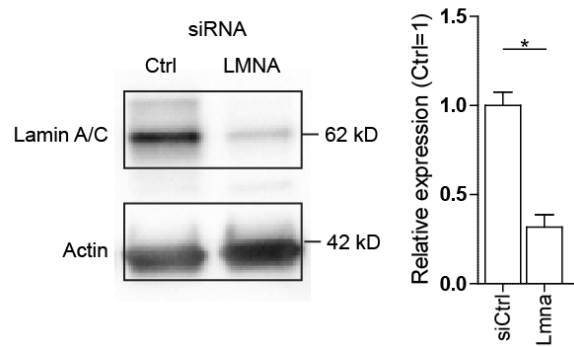

**B**

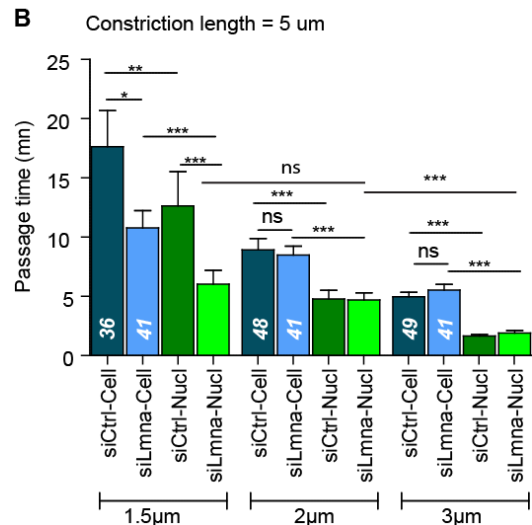

**C**

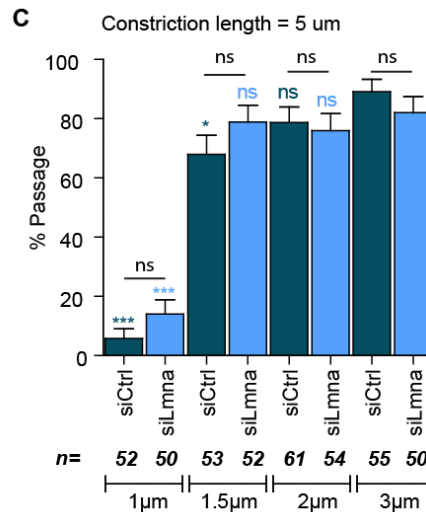

**Supplementary Figure 12: Effect of lamin A/C depletion on DCs passage through constrictions.** (A) Quantification of lamin A/C depletion after siRNA treatment in DCs. G-actin was used as a loading control. The Western blot on the left shows a typical experiment, while the quantification on the right shows mean and standard error for 4 independent experiments. (B) Cell (blue) and nuclear (green) passage time for control and lamin A/C depleted DCs as a function of constriction widths. Constrictions were 5 μm long. Numbers in bars represent the total number of cells scored. (C) Percentage of passage of control and Lamin A/C depleted DCs through 5 μm long constrictions. The percentage of passage in 1 μm constrictions was significantly different from zero for Lamin A/C depleted cells (P value = 0.02046) but not for control cells (P value=0.3134). n represents the number of cells. Unless when indicated with a spanner, statistical test was against the value for 5 μm wide constrictions. Error bars represent standard deviation.

Supplementary Figure 13

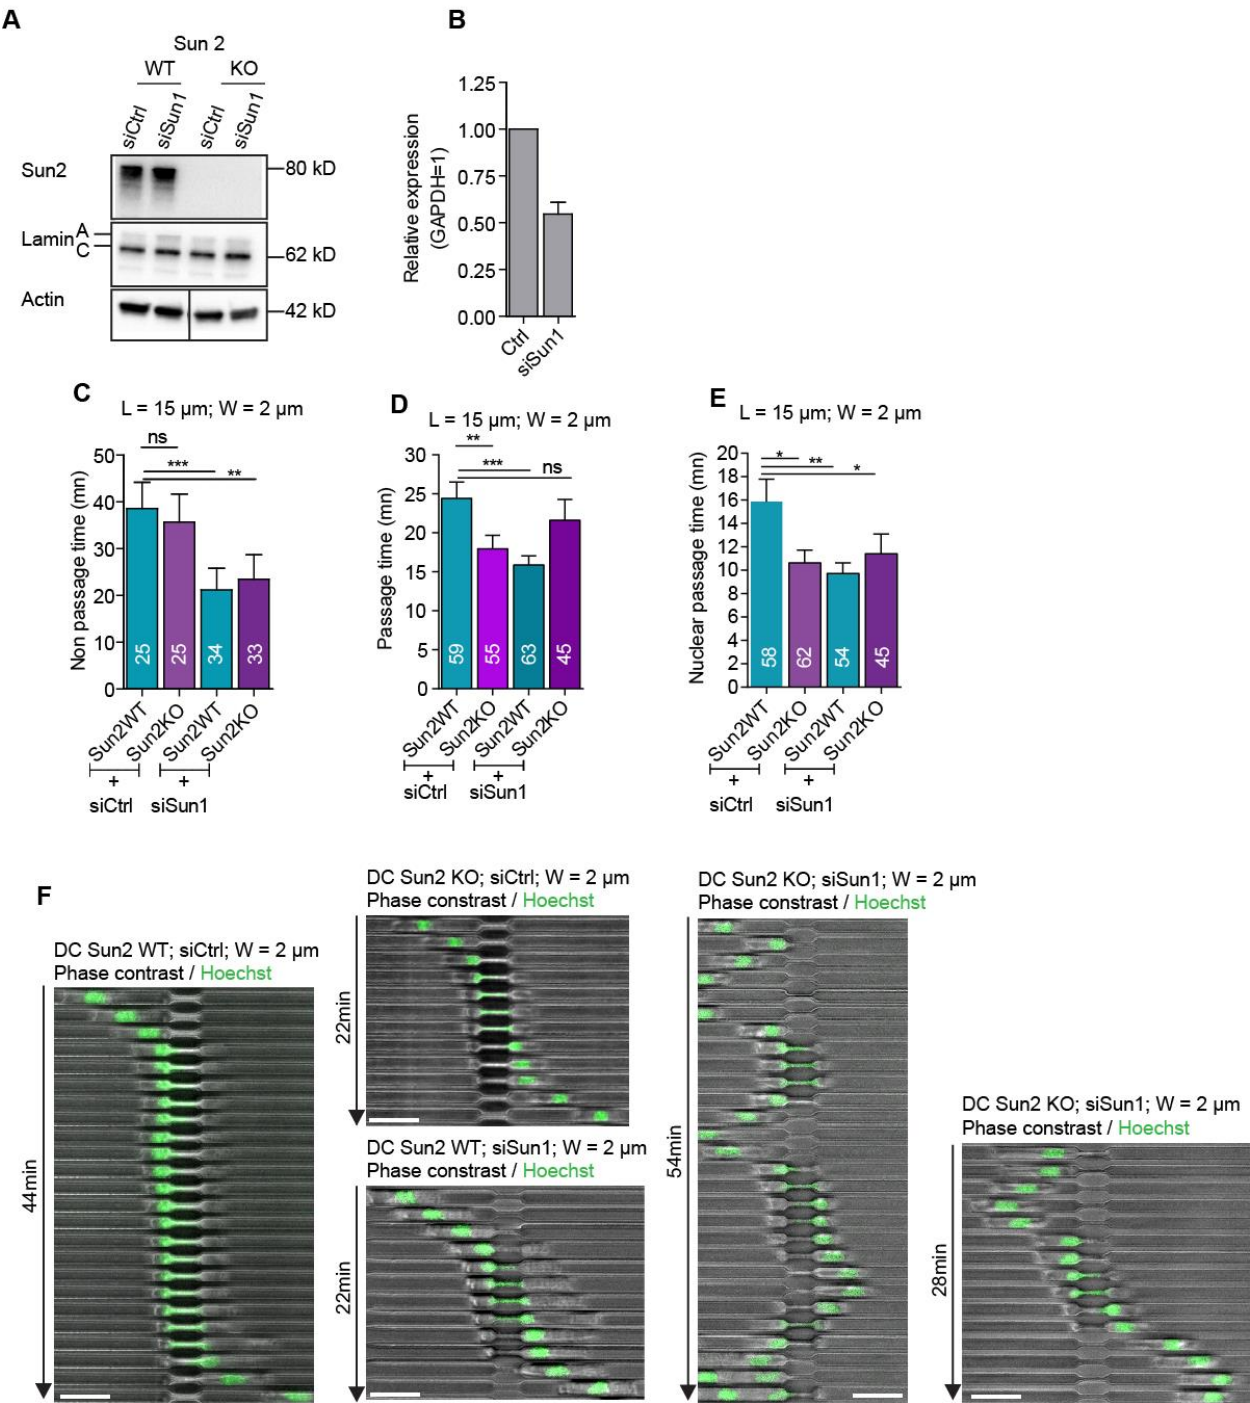

**Supplementary Figure 13: Sun 1 and Sun 2 depletion impact cell persistence but not the efficiency of passage through micrometric constrictions nor the perinuclear actin formation. (A)** Representative western blot of Sun 2 WT and KO dendritic cells electroporated with non-targeting siRNA. One can observe the depletion of Sun 2 without an effect on lamin A/C expression level. **(B)** qPCR based quantification of sun1 depletion after DCs electroporation with non-targeting or sun1 siRNA. **(C)** Non passage time, **(D)** cell passage time and **(E)** Nuclear passage time in DCs treated as indicated. siCtrl = control siRNA; siSun1 = Sun1 siRNA. Numbers represent the number of cells observed. Error bars are standard error of the mean. P\_value: \*\* and \* indicate  $< 0.001$ , and  $< 0.01$ . Statistical test: Mann-Whitney test. **(F)** Sequential images of a representative DCs treated as indicated in 2  $\mu\text{m}$  wide constrictions. Note the frequent change in direction observed in the Sun2 KO DCs electroporated with the sun 1 siRNA. Scale bar: 30  $\mu\text{m}$ .

Supplementary Figure 14

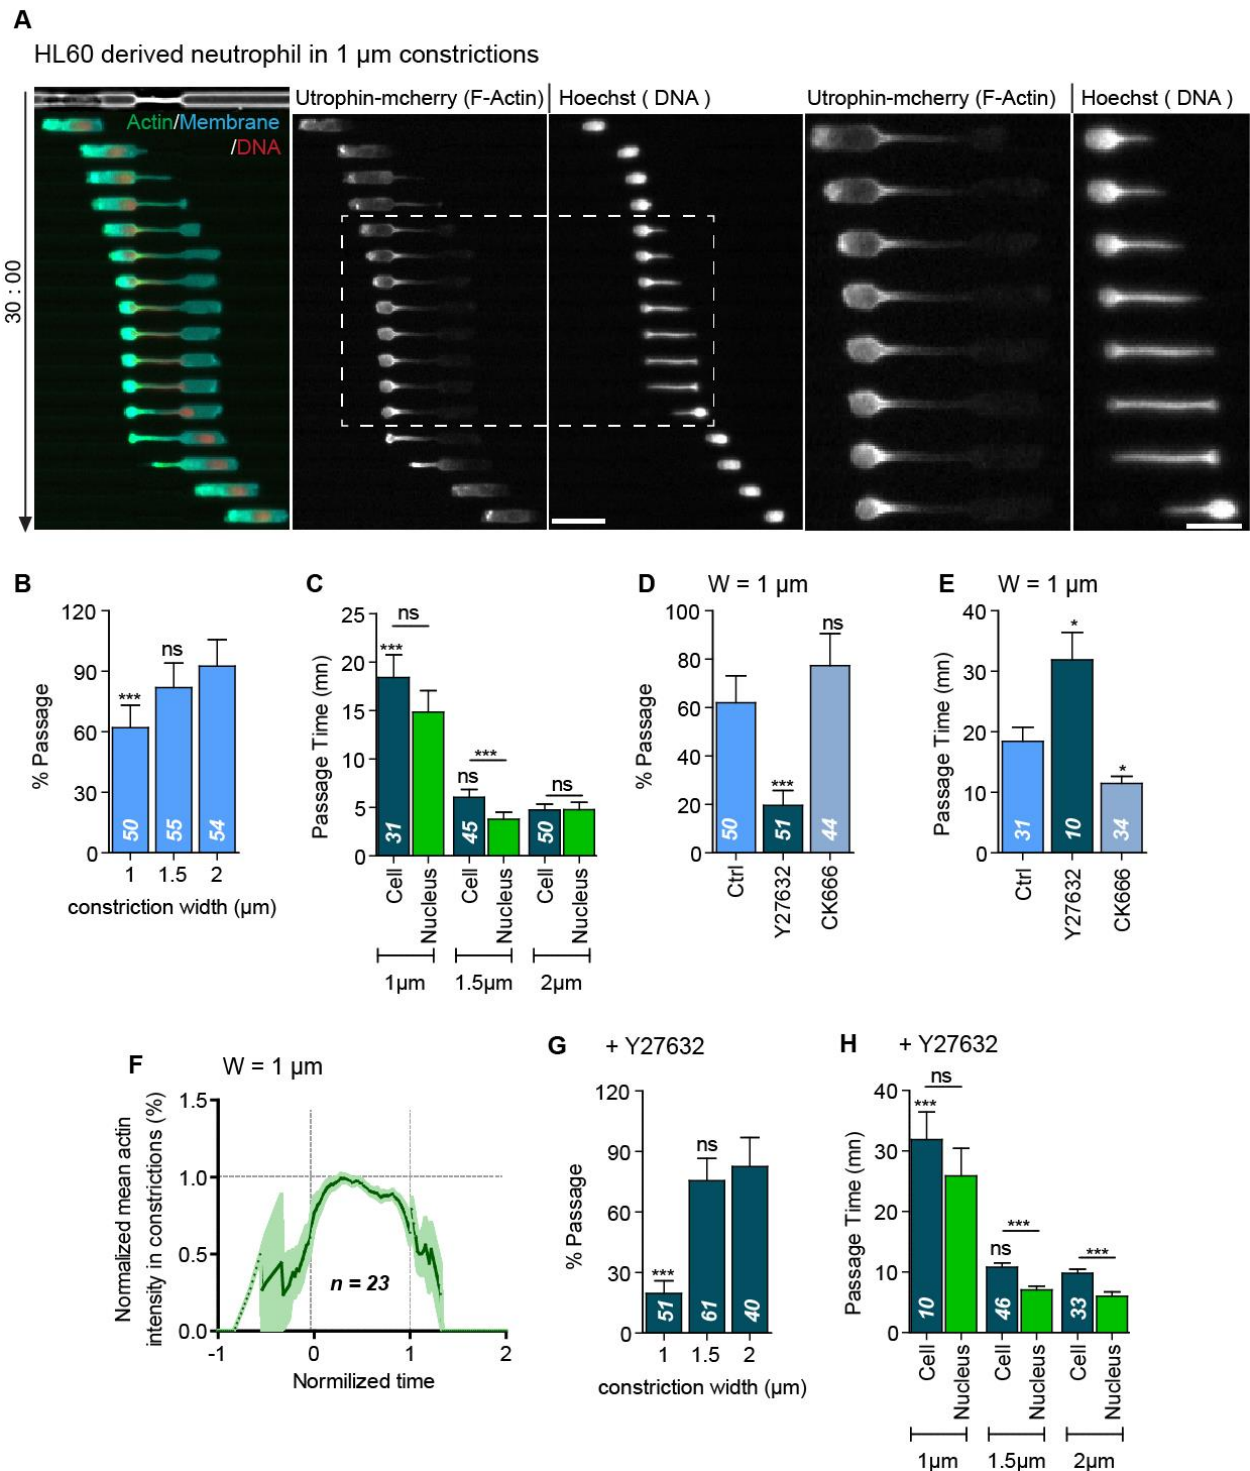

Supplementary Figure 14: Neutrophil passage through 1.5  $\mu\text{m}$  wide constrictions does not require Arp2/3 or contractility, but passage through 1  $\mu\text{m}$  requires

**contractility and not Arp2/3.** (A) Sequential images of a representative HL60-derived neutrophil migrating through a 20  $\mu\text{m}$  long, 1  $\mu\text{m}$  wide constriction. The plasma membrane (blue) was visualized with Lyn-Emerald expression, the F-actin cytoskeleton (green) with Utrophin-mCherry and DNA with Hoechst (red). A faint increase of F-actin could be observed in the constriction during nuclear passage, but most of the F-actin was located at the cell rear. Zoom on the nuclear passage event (two most right panels) illustrates nuclear deformation in the 1  $\mu\text{m}$  wide constriction. Scale bar 30  $\mu\text{m}$ ; zoomed image, 15  $\mu\text{m}$ . Time in minutes: seconds. (B) Percentage of passage of control HL60-derived neutrophils, as a function of the constrictions dimensions. More than 60% of control cells could still cross the 1  $\mu\text{m}$  wide constrictions which DCs cannot cross. (C) Passage time of control HL60-derived neutrophils as a function of the constrictions dimensions. (D) and (E) Respectively percentage of passage and passage time for 1  $\mu\text{m}$  wide constrictions, after ROCK (Y27632) or Arp2/3 (CK666) inhibition. (F) Mean actin intensity inside 1  $\mu\text{m}$  constrictions, normalized by the mean actin intensity in the whole cell. No actin enrichment was observed inside constrictions. (G) and (H) Respectively percentage of passage and passage time as a function of constrictions dimension for ROCK inhibited HL60-derived neutrophils (Y27632 treatment). ROCK inhibition did not affect HL60-derived neutrophils passage through constrictions larger than 1  $\mu\text{m}$ . (B), (C), (G) and (H) Unless when indicated by a spanner, statistical test was against the value for 2  $\mu\text{m}$  wide constrictions. (D) and (E) Statistical tests performed against Ctrl (for control). Quantification was done with actin-GFP expressing HL60 derived neutrophils in 5  $\mu\text{m}$  long constrictions. P\_values: \*\*\*, \* indicate  $< 0.0001$ ,  $< 0.01$ . ns = non-significant. Numbers in bars represent the number of cells observed. W: constriction width. Error bars represent standard deviation.

## Supplementary Figure 15

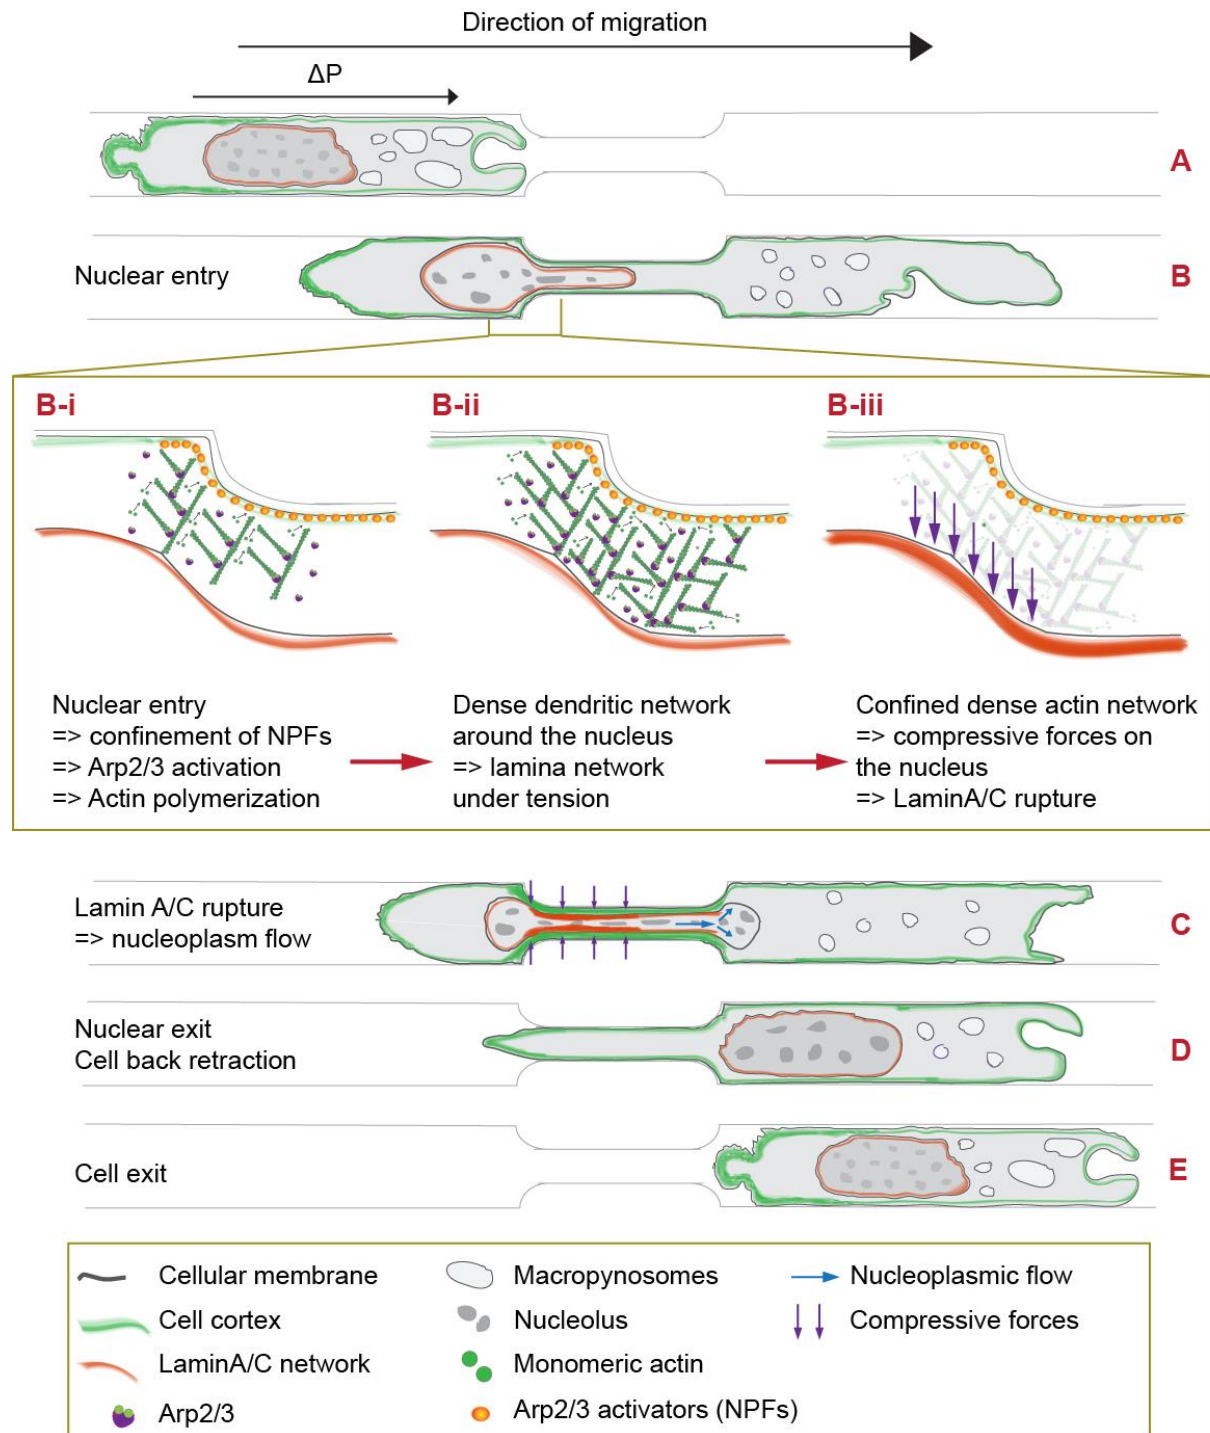

**Supplementary Figure 15: Working model for nuclear passage through micrometric constrictions.** **A)** Cell in channel with a front-back pressure gradient  $\Delta P$ . Black arrows illustrate the direction of the internal pressure gradient. **B)** Cell entering a

constriction.  $\Delta P$  allows first nuclear protrusion which confinement induces a local confinement of the plasma membrane, the nuclear membrane and the lamina. **B-i))** Confinement of Arp2/3 activators such as Wave 2 thus to local Arp2/3 activation. **B-ii))** The positive feedback loop between confinement and Wave2 activation generates the dense actin meshwork. **B-iii))** The confined dendritic network produce compressive forces (purple arrows) applied on the nucleus. The nuclear membrane reacts as a fluid and flow while the viscoelastic lamina network ruptures. **C)** Lamin A/C rupture releases the nuclear surface tension allowing the nucleoplasm which is a viscous liquid at this scale to flow in the constriction. The lamina network will repolymerize at the constriction exit. **D)** The internal pressure gradient drives back retraction. **E)** The cell exits the constriction and goes back to its initial state (**A**).

**Supplementary Table 1: Dimensions of constrictions used in the study.** L = length; W = width; H = height; C.S.A. = cross-section area; SD = standard deviation. SD C.S.A. is estimated as the product between W and SD of the height (SD H).

| L (μm)       | W (μm) | Mean H (μm) | SD H (μm) | Mean C.S.A. (μm <sup>2</sup> ) | SD C.S.A. (μm <sup>2</sup> ) |
|--------------|--------|-------------|-----------|--------------------------------|------------------------------|
| <b>20/15</b> | 1      | 2.26        | 0.23      | 2.26                           | 0.23                         |
|              | 1.5    | 2.96        | 0.28      | 4.44                           | 0.42                         |
|              | 2      | 3.43        | 0.33      | 6.86                           | 0.66                         |
|              | 3      | 4.2         | 0.11      | 12.6                           | 0.33                         |
|              | 4      | 4.39        | 0.1       | 17.56                          | 0.4                          |
|              | 5      | 4.56        | 0.07      | 22.8                           | 0.35                         |
|              | 7      | 4.7         | 0.11      | 32.9                           | 0.77                         |
| <b>5</b>     | 1      | 2.16        | 0.21      | 2.16                           | 0.21                         |
|              | 1.5    | 3.56        | 0.2       | 5.34                           | 0.3                          |
|              | 2      | 3.88        | 0.38      | 7.76                           | 0.76                         |
|              | 3      | 3.92        | 0.13      | 11.76                          | 0.39                         |
|              | 4      | 4.24        | 0.12      | 16.96                          | 0.48                         |
|              | 5      | 4.5         | 0.2       | 22.5                           | 1                            |
|              | 7      | 4.81        | 0.12      | 33.67                          | 0.84                         |

**Supplementary Table 2: Mean, standard deviation/ error on the mean, P values**

| Figure Panel | Condition                  | Mean     | SEM      | n  | Test         | P value against         | P value   |
|--------------|----------------------------|----------|----------|----|--------------|-------------------------|-----------|
| 1E           | 1 $\mu\text{m}$            | 4        | 0.565686 | 50 | Fisher test  | 5 $\mu\text{m}$         | < 2.2e-16 |
|              | 1.5 $\mu\text{m}$          | 40.74074 | 5.544113 | 54 | Fisher test  | 5 $\mu\text{m}$         | 1.59E-07  |
|              | 2 $\mu\text{m}$            | 61.29032 | 7.783879 | 62 | Fisher test  | 5 $\mu\text{m}$         | 0.001179  |
|              | 3 $\mu\text{m}$            | 78.68852 | 10.07503 | 61 | Fisher test  | 5 $\mu\text{m}$         | 0.2407    |
|              | 4 $\mu\text{m}$            | 82.35294 | 11.53172 | 51 | Fisher test  | 5 $\mu\text{m}$         | 0.4619    |
|              | 5 $\mu\text{m}$            | 90.56604 | 12.4402  | 53 | Fisher test  |                         |           |
|              |                            |          |          |    |              |                         |           |
| 1G           | 1.5 $\mu\text{m}$ -cell    | 22.41    | 3.485    | 22 | Mann whitney | 5 $\mu\text{m}$ -cell   | < 0.0001  |
|              | 1.5 $\mu\text{m}$ -Nucleus | 15       | 3.076    | 22 | Mann whitney | 1.5 $\mu\text{m}$ -cell | 0.0179    |
|              | 2 $\mu\text{m}$ -cell      | 18.45    | 1.559    | 38 | Mann whitney | 5 $\mu\text{m}$ -cell   | < 0.0001  |
|              | 2 $\mu\text{m}$ -Nucleus   | 12.21    | 1.403    | 38 | Mann whitney | 2 $\mu\text{m}$ -cell   | < 0.0001  |
|              | 3 $\mu\text{m}$ -cell      | 10.69    | 0.9817   | 48 | Mann whitney | 5 $\mu\text{m}$ -cell   | 0.6746    |
|              | 3 $\mu\text{m}$ -Nucleus   | 5.917    | 0.7262   | 48 | Mann whitney | 3 $\mu\text{m}$ -cell   | < 0.0001  |
|              | 4 $\mu\text{m}$ -cell      | 8.548    | 0.6468   | 42 | Mann whitney | 5 $\mu\text{m}$ -cell   | 0.1818    |
|              | 4 $\mu\text{m}$ -Nucleus   | 4.405    | 0.399    | 42 | Mann whitney | 4 $\mu\text{m}$ -cell   | < 0.0001  |
|              | 5 $\mu\text{m}$ -cell      | 9.458    | 0.6036   | 48 |              |                         |           |
|              | 5 $\mu\text{m}$ -Nucleus   | 4.75     | 0.4279   | 48 | Mann whitney | 5 $\mu\text{m}$ -cell   | < 0.0001  |

|    |                |          |          |     |              |           |          |
|----|----------------|----------|----------|-----|--------------|-----------|----------|
|    |                |          |          |     | y            |           |          |
| 1H | 1 µm-cell      | 0.8515   | 0.1886   | 39  |              |           |          |
|    | 1 µm-Nucleus   | 0.3924   | 0.2318   | 37  | Mann whitney | 1 µm-cell | < 0.0001 |
|    | 1.5 µm-cell    | 0.9095   | 0.05945  | 32  |              |           |          |
|    | 1.5 µm-Nucleus | 0.599    | 0.06113  | 32  | Mann whitney | 1 µm-cell | 0.0003   |
|    | 2 µm-cell      | 0.7267   | 0.07443  | 26  |              |           |          |
|    | 2 µm-Nucleus   | 0.4818   | 0.06487  | 26  | Mann whitney | 1 µm-cell | 0.0052   |
|    | 3 µm-cell      | 0.9241   | 0.03128  | 43  |              |           |          |
|    | 3 µm-Nucleus   | 0.9528   | 0.05255  | 43  | Mann whitney | 1 µm-cell | 0.5863   |
|    | 4 µm-cell      | 0.9883   | 0.04122  | 36  |              |           |          |
|    | 4 µm-Nucleus   | 0.9103   | 0.06128  | 36  | Mann whitney | 1 µm-cell | 0.3363   |
|    | 5 µm-cell      | 0.9929   | 0.03656  | 55  |              |           |          |
|    | 5 µm-Nucleus   | 0.9907   | 0.04256  | 55  | Mann whitney | 1 µm-cell | 0.9887   |
|    |                |          |          |     |              |           |          |
|    |                |          |          |     |              |           |          |
| 2A | DMSO           | 67.56757 | 5.441806 | 74  |              |           |          |
|    | Blebbi         | 50.63291 | 5.624989 | 79  | Fisher test  | DMSO      | 0.109    |
|    | MyoIIWT        | 56.71642 | 4.280195 | 134 |              |           |          |
|    | MyoIIKO        | 57.63547 | 4.010493 | 203 | Fisher test  | MyoIIWT   | 0.9888   |
|    | mDia1WT        | 66.66666 | 5.939139 | 63  |              |           |          |
|    | mDia1KO        | 56.16438 | 5.807412 | 73  | Fisher test  | mDia1WT   | 0.4432   |
|    | DMSO           | 78.26087 | 9.722034 | 23  |              |           |          |
|    | LatA_50nM      | 22.91667 | 12.6724  | 48  | Fisher       | DMSO      | 4.76E-05 |

|    |                |          |          |     |              |                |          |
|----|----------------|----------|----------|-----|--------------|----------------|----------|
|    |                |          | 2        |     | test         |                |          |
|    | DMSO           | 60       | 8.164966 | 60  |              |                |          |
|    | CK666          | 30.92784 | 8.438508 | 97  | Fisher test  | DMSO           | 0.001777 |
|    | siCtrl         | 71.64179 | 6.505819 | 67  |              |                |          |
|    | siArpC4        | 30.68182 | 8.875284 | 88  | Fisher test  | siCtrl         | 2.21E-06 |
|    | Hem1WT         | 78.26087 | 6.081553 | 46  |              |                |          |
|    | Hem1KO         | 28.57143 | 6.453628 | 49  | Fisher test  | Hem1WT         | 6.04E-06 |
|    | Hem1WT+ Blebbi | 64.15094 | 6.587224 | 53  |              |                |          |
|    | Hem1KO+Blebbi  | 20       | 5.163978 | 60  | Fisher test  | Hem1WT+ Blebbi | 9.86E-06 |
|    | DMSO           | 68.33334 | 6.005399 | 60  |              |                |          |
|    | Noco           | 85.96491 | 4.600772 | 57  | Fisher test  | DMSO           | 0.07748  |
|    |                |          |          |     |              |                |          |
| 2B | DMSO           | 10.3     | 0.9985   | 50  |              |                |          |
|    | Blebbi         | 28.63    | 3.432    | 40  | Mann Whitney | DMSO           | < 0.0001 |
|    | MyoIIWT        | 13.22    | 1.622    | 76  |              |                |          |
|    | MyoIIKO        | 19.69    | 1.77     | 125 | Mann Whitney | MyoIIWT        | < 0.0001 |
|    | DMSO           | 19.11    | 2.582    | 18  |              |                |          |
|    | LatA_50nM      | 66.55    | 15.56    | 11  | Mann Whitney | DMSO           | 0.0007   |
|    | DMSO           | 19.43    | 3.79     | 37  |              |                |          |
|    | CK666          | 15.93    | 3.142    | 29  | Mann Whitney | DMSO           | 0.1876   |
|    | DMSO           | 14.15    | 0.915    | 41  |              |                |          |
|    | Noco           | 9.673    | 0.3658   | 49  | Mann Whitney | DMSO           | < 0.0001 |
|    |                |          |          |     |              |                |          |

|    |           |          |          |      |                 |         |          |
|----|-----------|----------|----------|------|-----------------|---------|----------|
| 2C | MyoIIWT   | 4.871    | 0.0851   | 1067 |                 |         |          |
|    | MyoIIKO   | 2.738    | 0.05314  | 2529 | Mann<br>Whitney | MyoIIWT | < 0.0001 |
|    | mDia1WT   | 4.431    | 0.0485   | 2692 |                 |         |          |
|    | mDia1KO   | 4.185    | 0.07956  | 1263 | Mann<br>Whitney | mDia1WT |          |
|    | DMSO      | 4.624    | 0.3926   | 175  |                 |         |          |
|    | LatA_50nM | 5.529    | 0.2405   | 245  | Mann<br>Whitney | DMSO    | < 0.0001 |
|    | siCtrl    | 3.806    | 0.07374  | 2380 |                 |         |          |
|    | siArpC4   | 5.035    | 0.1278   | 717  | Mann<br>Whitney | siCtrl  | < 0.0001 |
| 2D | DMSO      | 20.92    | 4.018    | 24   |                 |         |          |
|    | Blebbs    | 21.26    | 2.863    | 39   | Mann<br>Whitney | DMSO    | 0.5705   |
|    | MyoIIWT   | 17.22    | 1.48     | 58   |                 |         |          |
|    | MyoIIKO   | 41.6     | 7.509    | 76   | Mann<br>Whitney | MyoIIWT | 0.0002   |
|    | DMSO      | 12.8     | 61.12    | 5    |                 |         |          |
|    | LatA_50nM | 3.929    | 20.47    | 33   | Mann<br>Whitney | DMSO    | 0.0015   |
|    | DMSO      | 36.7     | 8.421    | 23   |                 |         |          |
|    | CK666     | 163.4    | 23.12    | 67   | Mann<br>Whitney | DMSO    | 0.0003   |
|    | DMSO      | 15.63    | 1.671    | 19   |                 |         |          |
|    | Noco      | 10       | 0.8452   | 8    | Mann<br>Whitney | DMSO    | 0.0497   |
|    |           |          |          |      |                 |         |          |
| 2E | Control   | 45       | 11.1243  | 20   |                 |         |          |
|    | LatA_50nM | 40.54054 | 8.071503 | 37   | Fisher<br>test  | Control | 0.9665   |
|    | CK666     | 44.26229 | 8.51828  | 61   | Fisher          | Control | 1        |

|    |                             |          |          |     |              |                             |           |
|----|-----------------------------|----------|----------|-----|--------------|-----------------------------|-----------|
|    |                             |          | 3        |     | test         |                             |           |
| 4A | Control non passage         | 29.16667 | 11.02396 | 24  |              |                             |           |
|    | Control passage             | 100      | 16.66667 | 34  | Fisher test  | Control non passage         | 4.35E-09  |
|    | CK666 non passage           | 25.37313 | 6.153889 | 67  |              |                             |           |
|    | CK666 passage               | 40       | 11.54701 | 30  | Fisher test  | CK666 non passage           | 0.3383    |
|    | CK666 passage               |          |          |     | Fisher test  | Control passage             | 6.77E-08  |
| 5D | W = 2 $\mu$ m; L=15 $\mu$ m | 86.7347  | 3.426431 | 98  |              |                             |           |
|    | W = 2 $\mu$ m; L=5 $\mu$ m  | 43.24324 | 8.144549 | 37  | Fischer test | W = 2 $\mu$ m; L=15 $\mu$ m | 3.31E-06  |
|    | W = 8 $\mu$ m; L=0 $\mu$ m  | 5.633803 | 1.934928 | 142 | Fischer test | W = 2 $\mu$ m; L=15 $\mu$ m | < 2.2e-16 |
|    | 2D                          | 0        | 0        | 177 |              |                             |           |
| 5F | siCtrl - CK666              | 66       | 9.33381  | 50  |              |                             |           |
|    | siCtrl +CK666               | 39.39394 | 6.857605 | 33  | Fischer test | siCtrl - CK666              | 0.05715   |
|    | siLmnA - CK666              | 75       | 10.40063 | 52  |              |                             |           |
|    | siLmnA + CK666              | 77.77778 | 11.59443 | 45  | Fischer test | siLmnA - CK666              | 0.958     |
|    | siCtrl - blebbi             | 65.09434 | 4.629847 | 106 |              |                             |           |
|    | siCtrl + blebbi             | 54.73684 | 5.106819 | 95  | Fischer test | siCtrl - blebbi             | 0.3309    |
|    | siLmnA - blebbi             | 79.41177 | 3.467229 | 136 |              |                             |           |
|    | siLmnA + blebbi             | 51.26051 | 4.582036 | 119 | Fischer test | siLmnA - blebbi             | 5.44E-06  |
| 5G | siCtrl - CK666              | 19.7     | 2.507    | 33  |              |                             |           |
|    | siCtrl +CK666               | 27.46    | 5.988    | 13  | Mann Whitney | siCtrl - CK666              | 0.5825    |
|    | siLmnA - CK666              | 25.56    | 3.196    | 39  |              |                             |           |

|    |                               |          |              |     |                     |                             |          |
|----|-------------------------------|----------|--------------|-----|---------------------|-----------------------------|----------|
|    | siLmnA + CK666                | 22.69    | 3.627        | 35  | Mann<br>Whitne<br>y | siLmnA - CK666              | 0.095    |
|    | siCtrl - blebbi               | 15.62    | 1.456        | 69  |                     |                             |          |
|    | siCtrl + blebbi               | 27.81    | 3.532        | 52  | Mann<br>Whitne<br>y | siCtrl - blebbi             | < 0.0001 |
|    | siLmnA - blebbi               | 14.64    | 1.058        | 108 |                     |                             |          |
|    | siLmnA + blebbi               | 23.42    | 2.218        | 61  | Mann<br>Whitne<br>y | siLmnA - blebbi             | 0.0004   |
|    |                               |          |              |     |                     |                             |          |
| 5I | siCtrl - CK666                | 89.39394 | 15.5614<br>9 | 33  |                     |                             |          |
|    | siLmnA - CK666                | 42.30769 | 6.77465<br>2 | 39  | Fische<br>r test    | siCtrl - CK666              | 0.000161 |
|    | siCtrl +CK666                 | 30.76923 | 8.53384<br>9 | 13  | Fische<br>r test    | siCtrl - CK666              | 0.000773 |
|    | siLmnA + CK666                | 10       | 1.69030<br>8 | 35  | Fische<br>r test    | siLmnA - CK666              | 0.004933 |
|    |                               |          |              |     |                     |                             |          |
| 6A | Sun2WT                        | 69.41177 | 4.99786<br>2 | 85  |                     |                             |          |
|    | Sun2KO                        | 67.90124 | 5.18729      | 81  | Fisher<br>test      | Sun2WT                      | 0.9885   |
|    | Sun2WT+siSun1                 | 64.28571 | 4.84022<br>1 | 98  | Fisher<br>test      | Sun2WT                      | 0.7786   |
|    | Sun2KO+siSun1                 | 57.5     | 5.52692<br>3 | 80  | Fisher<br>test      | Sun2WT                      | 0.2882   |
|    | Sun2KO+siSun1                 |          |              |     | Fisher<br>test      | Sun2WT+siSun1               | 0.6591   |
|    |                               |          |              |     |                     |                             |          |
| 6E | % actin<br>accumulation2.5 µm | 9.090909 | 1.58252<br>4 | 33  | Fische<br>r test    | % actin<br>accumulation3 µm | 9.55E-11 |
|    | % actin accumulation3<br>µm   | 83.72093 | 12.7673<br>2 | 43  |                     |                             |          |
|    | % actin<br>accumulation3.5 µm | 28.26087 | 4.16683<br>8 | 46  | Fische<br>r test    | % actin<br>accumulation3 µm | 5.66E-07 |
|    | % cell passage 2.5<br>µm      | 39.39394 | 6.85760<br>5 | 33  | Fische<br>r test    | % cell passage 3<br>µm      | 0.04925  |
|    | % cell passage 3 µm           | 68.42105 | 11.0993<br>6 | 38  |                     |                             |          |
|    | % cell passage 3.5<br>µm      | 90       | 16.4316<br>8 | 30  | Fische<br>r test    | % cell passage 3<br>µm      | 0.1027   |

|     |                                     |          |          |     |              |                                   |           |
|-----|-------------------------------------|----------|----------|-----|--------------|-----------------------------------|-----------|
|     | % bead passage 2.5 $\mu\text{m}$    | 0        | 0        | 33  | Fischer test | % bead passage 3 $\mu\text{m}$    | 9.33E-11  |
|     | % bead passage 3 $\mu\text{m}$      | 69.76744 | 10.63943 | 43  |              |                                   |           |
|     | % bead passage 3.5 $\mu\text{m}$    | 97.4359  | 15.60223 | 39  | Fischer test | % bead passage 3 $\mu\text{m}$    | 0.002486  |
|     | % nuclear passage 2.5 $\mu\text{m}$ | 90.90909 | 15.82524 | 33  | Fischer test | % nuclear passage 3 $\mu\text{m}$ | 0.8681    |
|     | % nuclear passage 3 $\mu\text{m}$   | 94.73684 | 15.36835 | 38  |              |                                   |           |
|     | % nuclear passage 3.5 $\mu\text{m}$ | 100      | 17.96053 | 31  | Fischer test | % nuclear passage 3 $\mu\text{m}$ | 0.6544    |
|     |                                     |          |          |     |              |                                   |           |
| S1H | 1 $\mu\text{m}$                     | 24.6     | 3.28     | 48  | Mann Whitney | 4 $\mu\text{m}$                   | 0.726     |
|     | 1.5 $\mu\text{m}$                   | 15.5     | 2.24     | 32  | Mann Whitney | 4 $\mu\text{m}$                   | 0.4593    |
|     | 2 $\mu\text{m}$                     | 14.04    | 2.046    | 24  | Mann Whitney | 4 $\mu\text{m}$                   | 0.1942    |
|     | 3 $\mu\text{m}$                     | 19.15    | 4.841    | 13  | Mann Whitney | 4 $\mu\text{m}$                   | 0.6567    |
|     | 4 $\mu\text{m}$                     | 13.78    | 1.077    | 9   |              |                                   |           |
|     | 5 $\mu\text{m}$                     | 14.4     | 3.97     | 5   |              |                                   |           |
|     |                                     |          |          |     |              |                                   |           |
| S2D | 1 $\mu\text{m}$                     | 2.5      | 0.197642 | 160 | Fisher test  | 5 $\mu\text{m}$                   | < 2.2e-16 |
|     | 1.5 $\mu\text{m}$                   | 45.58823 | 5.528386 | 68  | Fisher test  | 5 $\mu\text{m}$                   | 1.52E-11  |
|     | 2 $\mu\text{m}$                     | 66.66666 | 9.3352   | 51  | Fisher test  | 5 $\mu\text{m}$                   | 1.42E-05  |
|     | 3 $\mu\text{m}$                     | 81.66666 | 10.54312 | 60  | Fisher test  | 5 $\mu\text{m}$                   | 0.007662  |
|     | 4 $\mu\text{m}$                     | 94.11765 | 11.41344 | 68  | Fisher test  | 5 $\mu\text{m}$                   | 0.5325    |
|     | 5 $\mu\text{m}$                     | 98.33334 | 12.69478 | 60  | Fisher test  |                                   |           |
|     |                                     |          |          |     |              |                                   |           |
|     |                                     |          |          |     |              |                                   |           |
| S2E | 1.5 $\mu\text{m}$                   | 13.43    | 2.068    | 30  | Mann Whitney | 5 $\mu\text{m}$                   | 0.0006    |

|     |                                       |          |              |     |                     |                                    |        |
|-----|---------------------------------------|----------|--------------|-----|---------------------|------------------------------------|--------|
|     |                                       |          |              |     | y                   |                                    |        |
|     | 2 $\mu\text{m}$                       | 10.47    | 1.43         | 34  | Mann<br>Whitne<br>y | 5 $\mu\text{m}$                    | 0.0362 |
|     | 3 $\mu\text{m}$                       | 8.122    | 0.6386       | 49  | Mann<br>Whitne<br>y | 5 $\mu\text{m}$                    | 0.1337 |
|     | 4 $\mu\text{m}$                       | 6.5      | 0.3698       | 68  | Mann<br>Whitne<br>y | 5 $\mu\text{m}$                    | 0.5569 |
|     | 5 $\mu\text{m}$                       | 6.583    | 0.3552       | 60  |                     |                                    |        |
|     |                                       |          |              |     |                     |                                    |        |
| S2F | 1 $\mu\text{m}$                       | 36.98    | 2.226        | 156 |                     |                                    |        |
|     | 1.5 $\mu\text{m}$                     | 33.49    | 2.629        | 37  |                     |                                    |        |
|     | 2 $\mu\text{m}$                       | 29.24    | 3.203        | 17  |                     |                                    |        |
|     | 3 $\mu\text{m}$                       | 15.45    | 2.893        | 11  |                     |                                    |        |
|     | 4 $\mu\text{m}$                       | 6.5      | 1.443        | 4   |                     |                                    |        |
|     | 5 $\mu\text{m}$                       | 8        |              | 1   |                     |                                    |        |
|     |                                       |          |              |     |                     |                                    |        |
| S4C | MyoIIWT_1.5 $\mu\text{m}$             | 69.49152 | 10.8527<br>5 | 60  |                     |                                    |        |
|     | MyoIIKO_1.5 $\mu\text{m}$             | 59.64912 | 10.2297<br>4 | 57  | Fisher<br>test      | MyoIIWT_1.5 $\mu\text{m}$          | 0.5027 |
|     | MyoIIWT_3 $\mu\text{m}$               | 91.83673 | 13.6902<br>1 | 49  |                     |                                    |        |
|     | MyoIIKO_3 $\mu\text{m}$               | 89.28571 | 12.6269<br>1 | 56  | Fisher<br>test      | MyoIIWT_3 $\mu\text{m}$            | 0.9189 |
|     |                                       |          |              |     |                     |                                    |        |
| S4D | MyoIIWT_1.5 $\mu\text{m}$ _Cell       | 24.39    | 2.547        | 41  |                     |                                    |        |
|     | MyoIIWT_1.5<br>$\mu\text{m}$ _Nucleus | 15.07    | 1.989        | 41  |                     |                                    |        |
|     | MyoIIKO_1.5 $\mu\text{m}$ _Cell       | 47       | 5.081        | 34  | Mann<br>Whitne<br>y | MyoIIWT_1.5<br>$\mu\text{m}$ _Cell | 0.0001 |
|     | MyoIIKO_1.5<br>$\mu\text{m}$ _Nucleus | 35.15    | 4.761        | 34  |                     |                                    |        |
|     | MyoIIWT_3 $\mu\text{m}$ _Cell         | 11.16    | 1.136        | 45  |                     |                                    |        |
|     | MyoIIWT_3<br>$\mu\text{m}$ _Nucleus   | 5.356    | 0.6921       | 45  |                     |                                    |        |
|     | MyoIIKO_1.5 $\mu\text{m}$ _Cell       | 13.2     | 1.365        | 50  | Mann<br>Whitne<br>y | MyoIIWT_3<br>$\mu\text{m}$ _Cell   | 0.0637 |

|     |                           |          |              |    |                     |                        |          |
|-----|---------------------------|----------|--------------|----|---------------------|------------------------|----------|
|     | MyoIIKO_1.5<br>µm_Nucleus | 6.2      | 0.5707       | 50 |                     |                        |          |
|     |                           |          |              |    |                     |                        |          |
| S5B | siCtrl_1.5µm              | 48.07692 | 6.92862<br>2 | 52 |                     |                        |          |
|     | siArpC4_1.5µm             | 24.19355 | 5.43884<br>9 | 62 | Fisher<br>test      | siCtrl_1.5µm           | 0.03119  |
|     | siCtrl_2µm                | 62.90323 | 6.13491<br>7 | 62 |                     |                        |          |
|     | siArpC4_2µm               | 29.16667 | 5.35668<br>4 | 72 | Fisher<br>test      | siCtrl_2µm             | 0.000467 |
|     | siCtrl_3µm                | 88.88889 | 3.95942<br>6 | 63 |                     |                        |          |
|     | siArpC4_3µm               | 75.38462 | 5.34303<br>5 | 65 | Fisher<br>test      | siCtrl_3µm             | 0.1447   |
|     | siCtrl_4µm                | 80.70175 | 5.22712<br>6 | 57 |                     |                        |          |
|     | siArpC4_4µm               | 82.6087  | 4.56304<br>1 | 69 | Fisher<br>test      | siCtrl_4µm             | 0.9641   |
|     |                           |          |              |    |                     |                        |          |
|     |                           |          |              |    |                     |                        |          |
| S5C | siCtrl_1.5µm_Cell         | 30.56    | 3.391        | 25 |                     |                        |          |
|     | siArpC4_1.5µm_Cell        | 33.13    | 5.767        | 15 | Mann<br>Whitne<br>y | siCtrl_1.5µm_Cell      | 0.8412   |
|     | siCtrl_1.5µm_Nucleus      | 20.12    | 2.53         | 25 | Mann<br>Whitne<br>y | siCtrl_1.5µm_Cell      | 0.005    |
|     | siArpC4_1.5µm_Nucleus     | 18.4     | 2.961        | 15 | Mann<br>Whitne<br>y | siArpC4_1.5µm_Cel<br>l | 0.0202   |
|     | siArpC4_1.5µm_Nucleus     |          |              |    | Mann<br>Whitne<br>y | siCtrl_1.5µm_Nucleus   | 0.7035   |
|     | siCtrl_2µm_Cell           | 32.08    | 3.016        | 39 |                     |                        |          |
|     | siArpC4_2µm_Cell          | 27.71    | 5.581        | 21 | Mann<br>Whitne<br>y | siCtrl_2µm_Cell        | 0.098    |
|     | siCtrl_2µm_Nucleus        | 21.31    | 2.483        | 39 | Mann<br>Whitne<br>y | siCtrl_2µm_Cell        | 0.0006   |
|     | siArpC4_2µm_Nucleus       | 19.48    | 5.356        | 21 | Mann<br>Whitne<br>y | siArpC4_2µm_Cell       | 0.0093   |

|      |                          |       |        |    |                     |                          |          |
|------|--------------------------|-------|--------|----|---------------------|--------------------------|----------|
|      | siArpC4_2µm_Nucleu<br>s  |       |        |    | Mann<br>Whitne<br>y | siCtrl_2µm_Nucleus       | 0.0615   |
|      | siCtrl_3µm_Cell          | 19.11 | 1.296  | 56 |                     |                          |          |
|      | siArpC4_3µm_Cell         | 12.15 | 1.226  | 49 | Mann<br>Whitne<br>y | siCtrl_3µm_Cell          | < 0.0001 |
|      | siCtrl_3µm_Nucleus       | 10.38 | 0.8377 | 56 | Mann<br>Whitne<br>y | siCtrl_3µm_Cell          | < 0.0001 |
|      | siArpC4_3µm_Nucleu<br>s  | 5.204 | 0.4061 | 49 | Mann<br>Whitne<br>y | siArpC4_3µm_Cell         | < 0.0001 |
|      | siArpC4_3µm_Nucleu<br>s  |       |        |    | Mann<br>Whitne<br>y | siCtrl_3µm_Nucleus       | < 0.0001 |
|      | siCtrl_4µm_Cell          | 15.04 | 1.034  | 46 |                     |                          |          |
|      | siArpC4_4µm_Cell         | 12.98 | 1.258  | 57 | Mann<br>Whitne<br>y | siCtrl_4µm_Cell          | 0.0061   |
|      | siCtrl_4µm_Nucleus       | 8.783 | 0.7169 | 46 | Mann<br>Whitne<br>y | siCtrl_4µm_Cell          | < 0.0001 |
|      | siArpC4_4µm_Nucleu<br>s  | 6.912 | 0.939  | 57 | Mann<br>Whitne<br>y | siArpC4_4µm_Cell         | < 0.0001 |
|      | siArpC4_4µm_Nucleu<br>s  |       |        |    | Mann<br>Whitne<br>y | siCtrl_4µm_Nucleus       | 0.0004   |
|      |                          |       |        |    |                     |                          |          |
| S12B | siCtrl_1.5µm_Cell        | 17.64 | 3.04   | 36 |                     |                          |          |
|      | siLmna_1.5µm_Cell        | 10.78 | 1.449  | 41 | Mann<br>Whitne<br>y | siCtrl_1.5µm_Cell        | 0.0043   |
|      | siCtrl_1.5µm_Nucleus     | 12.64 | 2.898  | 36 | Mann<br>Whitne<br>y | siCtrl_1.5µm_Cell        | 0.0043   |
|      | siLmna_1.5µm_Nucle<br>us | 6.024 | 1.167  | 41 | Mann<br>Whitne<br>y | siLmna_1.5µm_Cell        | < 0.0001 |
|      | siLmna_1.5µm_Nucle<br>us |       |        |    | Mann<br>Whitne<br>y | siCtrl_1.5µm_Nucle<br>us | 0.0035   |
|      | siLmna_1.5µm_Nucle<br>us |       |        |    | Mann<br>Whitne<br>y | siLmna_2µm_Nucle<br>us   | 0.3871   |

|      |                    |          |          |    |                     |                    |           |
|------|--------------------|----------|----------|----|---------------------|--------------------|-----------|
|      | siCtrl_2µm_Cell    | 8.917    | 0.9601   | 48 |                     |                    |           |
|      | siLmna_2µm_Cell    | 8.488    | 0.754    | 41 | Mann<br>Whitne<br>y | siCtrl_2µm_Cell    | 0.8514    |
|      | siCtrl_2µm_Nucleus | 4.792    | 0.7108   | 48 | Mann<br>Whitne<br>y | siCtrl_2µm_Cell    | < 0.0001  |
|      | siLmna_2µm_Nucleus | 4.707    | 0.5929   | 41 | Mann<br>Whitne<br>y | siLmna_2µm_Cell    | < 0.0001  |
|      | siLmna_2µm_Nucleus |          |          |    | Mann<br>Whitne<br>y | siCtrl_2µm_Nucleus | 0.618     |
|      | siCtrl_3µm_Cell    | 4.959    | 0.3928   | 49 |                     |                    |           |
|      | siLmna_3µm_Cell    | 5.537    | 0.466    | 41 | Mann<br>Whitne<br>y | siCtrl_3µm_Cell    | 0.145     |
|      | siCtrl_3µm_Nucleus | 1.653    | 0.133    | 49 | Mann<br>Whitne<br>y | siCtrl_3µm_Cell    | < 0.0001  |
|      | siLmna_3µm_Nucleus | 1.915    | 0.1928   | 41 | Mann<br>Whitne<br>y | siLmna_3µm_Cell    | < 0.0001  |
|      | siLmna_3µm_Nucleus |          |          |    | Mann<br>Whitne<br>y | siCtrl_3µm_Nucleus | 0.2402    |
|      | siLmna_3µm_Nucleus |          |          |    | Mann<br>Whitne<br>y | siLmna_2µm_Nucleus | < 0.0001  |
|      |                    |          |          |    |                     |                    |           |
| S12C | siCtrl_1µm         | 5.769231 | 3.233357 | 52 | Fisher<br>test      | siCtrl_3µm         | < 2.2e-16 |
|      | siLmna_1µm         | 14       | 4.907138 | 50 | Fisher<br>test      | siLmna_3µm         | 1.57E-11  |
|      | siLmna_1µm         |          |          |    | Fisher<br>test      | siCtrl_1µm         | 0.3957    |
|      | siCtrl_1.5µm       | 67.92453 | 6.411533 | 53 | Fisher<br>test      | siCtrl_3µm         | 0.02725   |
|      | siLmna_1.5µm       | 78.84615 | 5.663478 | 52 | Fisher<br>test      | siLmna_3µm         | 0.9366    |
|      | siLmna_1.5µm       |          |          |    | Fisher<br>test      | siCtrl_1.5µm       | 0.4554    |
|      | siCtrl_2µm         | 78.68852 | 5.243214 | 61 | Fisher<br>test      | siCtrl_3µm         | 0.3123    |
|      | siLmna_2µm         | 75.92593 | 5.81799  | 54 | Fisher              | siLmna_3µm         | 0.7469    |

|      |               |          |          |    |              |               |           |
|------|---------------|----------|----------|----|--------------|---------------|-----------|
|      |               |          |          |    | test         |               |           |
|      | siLmna_2µm    |          |          |    | Fisher test  | siCtrl_2µm    | 0.946     |
|      | siCtrl_3µm    | 89.09091 | 4.20368  | 55 |              |               |           |
|      | siLmna_3µm    | 82       | 5.433231 | 50 | Fisher test  | siCtrl_3µm    | 0.6166    |
|      |               |          |          |    |              |               |           |
| S13C | Sun2WT        | 38.62    | 5.618    | 26 |              |               |           |
|      | Sun2KO        | 35.69    | 5.996    | 26 |              |               |           |
|      | Sun2WT+siSun1 | 21.2     | 4.616    | 35 | Mann Whitney | Sun2WT        | 0.0008    |
|      | Sun2KO+sisun1 | 23.48    | 5.216    | 33 | Mann Whitney | Sun2KO        | 0.0757    |
|      |               |          |          |    |              |               |           |
| S13D | Sun2WT        | 24.42    | 2.067    | 59 |              |               |           |
|      | Sun2KO        | 17.93    | 1.744    | 55 | Mann Whitney | Sun2WT        | 0.0011    |
|      | Sun2WT+siSun1 | 15.86    | 1.171    | 63 | Mann Whitney | Sun2WT        | < 0.0001  |
|      | Sun2KO+sisun1 | 21.62    | 2.63     | 45 | Mann Whitney | Sun2WT        | 0.0743    |
|      | Sun2KO+sisun1 |          |          |    | Mann Whitney | Sun2KO        | 0.332     |
|      |               |          |          |    |              |               |           |
|      |               |          |          |    |              |               |           |
| S13E | Sun2WT_siCtrl | 15.86    | 1.904    | 59 |              |               |           |
|      | Sun2KO_siCtrl | 10.62    | 1.082    | 55 | Mann Whitney | Sun2WT_siCtrl | 0.0115    |
|      | Sun2WT_siSun1 | 9.73     | 0.8912   | 63 | Mann Whitney | Sun2WT_siCtrl | 0.0016    |
|      | Sun2KO_siSun1 | 11.41    | 1.677    | 46 | Mann Whitney | Sun2WT_siCtrl | 0.0244    |
| S14B | 1 µm          | 62       | 6.86     | 50 | Fischer test | 2 µm          | 0.0006424 |
|      | 1.5 µm        | 81.81    | 5.2      | 55 | Fische       | 2 µm          | 0.2629    |

|      |                |           |          |    |              |             |           |
|------|----------------|-----------|----------|----|--------------|-------------|-----------|
|      |                |           |          |    | r test       |             |           |
|      | 2 µm           | 92.59     | 3.56     | 54 |              |             |           |
|      |                |           |          |    |              |             |           |
| S14C | 1 µm-cell      | 18.42     | 2.341    | 31 |              | 2 µm-cell   | < 0.0001  |
|      | 1 µm-Nucleus   | 14.84     | 2.229    | 31 | Mann whitney | 1 µm-cell   | 0.1525    |
|      | 1.5 µm-cell    | 6.044     | 0.7939   | 45 |              | 2 µm-cell   | 0.0844    |
|      | 1.5 µm-Nucleus | 3.791     | 0.7103   | 43 | Mann whitney | 1.5 µm-cell | < 0.0001  |
|      | 2 µm-cell      | 4.748     | 0.5854   | 50 |              |             |           |
|      | 2 µm-Nucleus   | 4.778     | 0.7630   | 27 | Mann whitney | 2 µm-cell   | 0.9783    |
|      |                |           |          |    |              |             |           |
| S14D | Ctrl           | 62.       | 6.86     | 50 |              |             |           |
|      | Y27632         | 19.607840 | 5.559    | 51 | Fisher test  | Ctrl        | 6.713E-05 |
|      | CK666          | 77.272730 | 6.317    | 44 | Fisher test  | Ctrl        | 0.271     |
|      |                |           |          |    |              |             |           |
| S14E | Ctrl           | 18.42     | 2.341    | 31 |              |             |           |
|      | Y27632         | 31.90     | 4.500    | 10 | Mann whitney | Ctrl        | 0.0107    |
|      | CK666          | 11.44     | 1.225    | 34 | Mann whitney | Ctrl        | 0.0202    |
|      |                |           |          |    |              |             |           |
| S14G | 1 µm           | 19.60784  | 5.559512 | 10 | Fischer test | 2 µm        | 7.139e-09 |
|      | 1.5 µm         | 75.40984  | 5.51353  | 61 | Fischer test | 2 µm        | 0.717     |
|      | 2 µm           | 82.5      | 6.007807 | 40 |              |             |           |
|      |                |           |          |    |              |             |           |
| S14H | 1 µm-cell      | 31.90     | 4.500    | 10 |              | 2 µm-cell   | < 0.0001  |

|  |                     |       |        |    |              |                  |          |
|--|---------------------|-------|--------|----|--------------|------------------|----------|
|  | 1 $\mu$ m-Nucleus   | 25.90 | 4.510  | 10 | Mann whitney | 1 $\mu$ m-cell   | 0.2896   |
|  | 1.5 $\mu$ m-cell    | 10.78 | 0.6852 | 46 |              | 2 $\mu$ m-cell   | 0.3705   |
|  | 1.5 $\mu$ m-Nucleus | 7.043 | 0.6278 | 46 | Mann whitney | 1.5 $\mu$ m-cell | < 0.0001 |
|  | 2 $\mu$ m-cell      | 9.788 | 0.7054 | 33 |              |                  |          |
|  | 2 $\mu$ m-Nucleus   | 6.000 | 0.7042 | 32 | Mann whitney | 2 $\mu$ m-cell   | 0.0001   |
|  |                     |       |        |    |              |                  |          |

## Supplementary Discussion

### Amoeboid versus mesenchymal migration

A recent article described a role for Myosin II based contraction at the front of the cell producing a pulling force on the nucleus<sup>1</sup>. Our results on Myosin II and actin localization as well as the results on Myosin II depletion and RICM imaging together rule out this mechanism for DCs migrating through constrictions. DCs are typical amoeboid cells, which move at high speed (mean velocity of 4.5  $\mu$ m.min<sup>-1</sup>), while HFFs cells studied in Petrie et al are slow mesenchymal cells (mean velocity of 10  $\mu$ m.h<sup>-1</sup>,<sup>1</sup>). DCs move based on rear contraction and actin retrograde flow<sup>2</sup>, they lack focal adhesions and do not rely on protrusive activity at the cell front. This is confirmed by the fact that Arp2/3 depletion makes these cells faster, while it reduces actin at the cell front, consistent with other recent studies on leukocytes<sup>3,4</sup>. We also recently showed that accumulation of Myosin II at the front of DCs, while required, together with Arp2/3 activity, for macropinocytosis, impedes cell migration<sup>5</sup>. Conversely, mesenchymal migration relies on actin polymerisation in front protrusions and on focal adhesions, with a front localisation of Myosin II, likely explaining the difference of mechanism for moving their nucleus through dense environments.

### Actin structures and the cell nucleus

Several studies have reported the accumulation of actin filaments around the nucleus. A first set of articles have reported actin fibers resembling stress fibers (Actin cap<sup>6</sup> and TAN Lines<sup>7</sup>), but present on top of the nucleus and participating in its deformation, in mesenchymal cells plated on flat substrates<sup>6-11</sup>. A recent article also reported a formin (INF2) based nucleation of actin filaments around the nucleus triggered by external deformation imposed upon the cell and thus the nucleus<sup>12</sup>. While these phenomena might contribute to the formation of the actin accumulation we report for DCs migrating through constrictions, previously described perinuclear actin structures have a number of characteristics that make them likely to be different structures, with different functions, more related to mesenchymal cells. First, both the actin cap and TAN lines contain Myosin II and are associated to focal adhesions, forming arcs above the nucleus and deform it by exerting contractile forces<sup>10</sup>. They were also reported to interact with the nucleus through the LINC complex<sup>6,7</sup>, and proposed to originate from focal adhesions thus being most likely nucleated by formins rather than Arp2/3. In complete contrast, the actin accumulation we report is based on Wave2 (Hem1)/Arp2/3 nucleator; we did not observe any Myosin II around the nucleus; the LINC complex is not required for the transmission of forces to the nucleus by the actin structure we observed, and the forces exerted on the nucleus seem to rather be compressive forces than contractile forces. Finally, we could not observe well defined contractile fibers and DCs do not require integrin based adhesion (and thus focal adhesions) to migrate<sup>13,14</sup>. Overall, these observations suggest that the actin structures we observed, while also associated to the nucleus, are different from structures previously reported in mesenchymal cells. Consistent with the observation of actin accumulation occurring also around confined passive objects (beads), we propose that the actin structures we observed result from confinement of a branched actin network, resulting in increased density of branches, leading to a strong pushing force, as previously proposed based on *in vitro* experiments<sup>15</sup>.

#### Effect of LINC depletion on passage time through constrictions

A surprising result from our study is that disruption of the LINC complex decreases the cell and nuclear passage time through 2  $\mu\text{m}$  wide constriction (Supplementary Fig. 13D, E) suggesting a negative role of the nucleo-cytoskeleton connection on the speed of cell passage. We also observed, consistent with the literature<sup>16</sup>, that depletion of SUN proteins decreases cell persistence (Supplementary Fig. 13C), but not to an extent that could affect cell passage through constrictions. A recent study proposed that disconnecting the chromatin from the nuclear envelope would facilitate chromatin flow<sup>17</sup>. The LINC participates in the physical connection between the chromatin, the nuclear envelope and the cytoskeleton. It could thus reduce the capacity of chromatin to flow relative to these structures. Its depletion might thus facilitate the movement of chromatin during nuclear deformation through the constriction, which would be consistent with our results.

### Supplementary References

1. Petrie, R. J., Koo, H. & Yamada, K. M. Generation of compartmentalized pressure by a nuclear piston governs cell motility in a 3D matrix. *Science* **345**, 1062–1065 (2014).
2. Liu, Y.-J. *et al.* Confinement and Low Adhesion Induce Fast Amoeboid Migration of Slow Mesenchymal Cells. *Cell* **160**, 659–672 (2015).
3. Wilson, K. *et al.* Mechanisms of leading edge protrusion in interstitial migration. *Nat. Commun.* **4**, (2013).
4. Pablo Vargas *et al.* Innate control of actin nucleation determines two distinct migration behaviours in dendritic cells. *Nat. Cell Biol.* (In Press).
5. Chabaud, M. *et al.* Cell migration and antigen capture are antagonistic processes coupled by myosin II in dendritic cells. *Nat. Commun.* **6**, 7526 (2015).

6. Khatau, S. B. *et al.* A perinuclear actin cap regulates nuclear shape. *Proc. Natl. Acad. Sci.* **106**, 19017–19022 (2009).
7. Luxton, G. W. G., Gomes, E. R., Folker, E. S., Vintinner, E. & Gundersen, G. G. Linear Arrays of Nuclear Envelope Proteins Harness Retrograde Actin Flow for Nuclear Movement. *Science* **329**, 956–959 (2010).
8. Gomes, E. R., Jani, S. & Gundersen, G. G. Nuclear Movement Regulated by Cdc42, MRCK, Myosin, and Actin Flow Establishes MTOC Polarization in Migrating Cells. *Cell* **121**, 451–463 (2005).
9. Versaevel, M., Grevesse, T. & Gabriele, S. Spatial coordination between cell and nuclear shape within micropatterned endothelial cells. *Nat. Commun.* **3**, 671 (2012).
10. Kim, D.-H., Chambliss, A. B. & Wirtz, D. The multi-faceted role of the actin cap in cellular mechanosensation and mechanotransduction. *Soft Matter* **9**, 5516–5523 (2013).
11. Gay, O. *et al.* RefilinB (FAM101B) targets filamin A to organize perinuclear actin networks and regulates nuclear shape. *Proc. Natl. Acad. Sci. U. S. A.* **108**, 11464–11469 (2011).
12. Shao, X., Li, Q., Mogilner, A., Bershadsky, A. D. & Shivashankar, G. V. Mechanical stimulation induces formin-dependent assembly of a perinuclear actin rim. *Proc. Natl. Acad. Sci. U. S. A.* **112**, E2595–2601 (2015).
13. Lämmermann, T. *et al.* Rapid leukocyte migration by integrin-independent flowing and squeezing. *Nature* **453**, 51–55 (2008).
14. Renkawitz, J. *et al.* Adaptive force transmission in amoeboid cell migration. *Nat. Cell Biol.* **11**, 1438–1443 (2009).

15. Parekh, S. H., Chaudhuri, O., Theriot, J. A. & Fletcher, D. A. Loading history determines the velocity of actin-network growth. *Nat. Cell Biol.* **7**, 1219–1223 (2005).
16. Lombardi, M. L. *et al.* The Interaction between Nesprins and Sun Proteins at the Nuclear Envelope Is Critical for Force Transmission between the Nucleus and Cytoskeleton. *J. Biol. Chem.* **286**, 26743–26753 (2011).
17. Schreiner, S. M., Koo, P. K., Zhao, Y., Mochrie, S. G. J. & King, M. C. The tethering of chromatin to the nuclear envelope supports nuclear mechanics. *Nat. Commun.* **6**, (2015).
